# Supplementary material for: Integration of protein context improves protein-based COVID-19 patient stratification
Source: Clin Proteomics. 2022 Aug 11;19:31. doi: 10.1186/s12014-022-09370-0 (PMC9366758; doi:10.1186/s12014-022-09370-0)
Supplement: Supplementary file 3 — Additional file 3: Table S2. The total 868 features based on 331 proteins. [file 12014_2022_9370_MOESM3_ESM.csv]

Table S2. The total 868 features based on 331 proteins
	logFC	AveExpr	t	P.Value	adj.P.Val	B
MYRIP	1.137502978	-5.87E-17	4.798791283	1.09E-05	0.003690887	3.248247499
SAA2,SAA1,YLPM1	1.135944734	-1.46E-17	4.789718301	1.12E-05	0.003690887	3.218167892
MTTP_degree	1.119481792	-7.49E-17	4.694716608	1.58E-05	0.003690887	2.904654838
C9	1.115867175	2.64E-16	4.674063285	1.70E-05	0.003690887	2.836854494
IGLV1-47	-1.057383746	9.65E-16	-4.349527333	5.33E-05	0.007507907	1.789583726
SAA1	1.05599336	-1.30E-18	4.342021272	5.48E-05	0.007507907	1.765789367
YLPM1_degree	1.050592302	-3.78E-17	4.312950881	6.05E-05	0.007507907	1.67382901
phagocytosis, engulfment	-1.031792203	-2.11E-16	-4.212824957	8.54E-05	0.00834341	1.35949725
TTR-RBP complex	-1.031088911	-3.03E-17	-4.209110758	8.65E-05	0.00834341	1.347910178
TTR	-1.023281162	4.28E-16	-4.168025627	9.95E-05	0.008638211	1.220095108
SAA2	0.999137741	2.20E-17	4.042664693	0.000151985	0.010138959	0.834251105
SIRT7_degree	0.995912861	-8.42E-17	4.0261074	0.000160653	0.010138959	0.783770327
GC/ACTB	0.994877044	-6.76E-17	4.020798437	0.000163532	0.010138959	0.76760831
GC/GSN	0.994877044	-6.76E-17	4.020798437	0.000163532	0.010138959	0.76760831
TDRD1	-0.986643484	-3.35E-16	-3.978755154	0.000188154	0.010887843	0.640036006
IGHM/GCN1	0.9796997	1.34E-16	3.943511837	0.000211511	0.011474448	0.533677749
SIRT7	0.963773944	3.08E-17	3.863402045	0.000275429	0.014063098	0.293934973
RBP4/TTR	0.958580072	2.80E-17	3.837488498	0.000299815	0.014457732	0.216994937
SERPINB5	0.945617294	-2.05E-16	3.773258352	0.000369512	0.01688086	0.027606443
CCDC54	0.92407005	1.69E-16	3.667854621	0.000518649	0.022509349	-0.279009567
IGHG3	-0.920632012	8.24E-16	-3.65118944	0.000546958	0.022556674	-0.327001098
A2M_degree	0.917755506	4.36E-17	3.637277806	0.000571713	0.022556674	-0.36695949
SAA2/YLPM1	0.913354926	3.91E-17	3.616050623	0.000611557	0.023079616	-0.427747435
cytolysis	0.907157909	-9.15E-17	3.586270227	0.000671941	0.024301851	-0.51265352
RGS8_degree	0.889617163	-1.17E-16	3.502673371	0.000873273	0.029278129	-0.748611028
B cell receptor signaling pathway	-0.889328934	2.47E-16	-3.501308161	0.000876995	0.029278129	-0.752434839
phagocytosis, recognition	-0.880057969	-6.01E-16	-3.457538391	0.001004603	0.030437149	-0.874517509
SRGAP1_degree	0.877835984	-1.88E-16	3.44708879	0.001037574	0.030437149	-0.903515757
COPG2_degree	0.87722651	-2.78E-17	3.444225274	0.001046787	0.030437149	-0.911452168
immunoglobulin receptor binding	-0.874304349	2.85E-16	-3.430512207	0.001091991	0.030437149	-0.949398875
positive regulation of B cell activation	-0.87343549	4.02E-16	-3.426440011	0.001105768	0.030437149	-0.9606483
SCFD2	-0.872417537	1.50E-16	-3.421672042	0.001122107	0.030437149	-0.973808627
SERPINB5_degree	0.869526415	-5.76E-17	3.408147981	0.001169706	0.030766803	-1.011071426
immunoglobulin complex, circulating	-0.867405231	3.31E-16	-3.39824202	0.001205777	0.030782771	-1.038303443
IGHV3-73_degree	0.859337849	-8.11E-17	3.360693488	0.001352292	0.032918414	-1.141048159
COPG2	0.856895073	5.35E-17	3.349362984	0.00139971	0.032918414	-1.171902359
OPHN1_degree	0.854109593	-1.11E-16	3.33646483	0.001455601	0.032918414	-1.206940379
CFHR2_degree	0.853543175	2.11E-17	3.333844882	0.001467208	0.032918414	-1.214046405
phosphatidylcholine binding	-0.852969303	-1.17E-16	-3.331191435	0.001479053	0.032918414	-1.221239459
SPTBN5_degree	0.850522468	-8.42E-17	3.319888872	0.001530526	0.033212421	-1.251835597
Fc-gamma receptor signaling pathway involved in phagocytosis	-0.844798833	3.04E-16	-3.293519219	0.001657266	0.034370634	-1.322944885
JAK2	-0.843041105	-2.82E-16	-3.285440445	0.001698035	0.034370634	-1.344653328
SCFD2_degree	0.842842683	1.21E-16	3.284529032	0.001702693	0.034370634	-1.347100104
LILRB4/CLU	-0.837915452	-1.07E-16	-3.261933588	0.001822101	0.035703714	-1.407611593
CFHR2	0.835733985	1.64E-17	3.251952187	0.001877322	0.035703714	-1.434251122
CRYBG3	-0.835158696	6.19E-16	-3.249322211	0.001892132	0.035703714	-1.441260983
IGKV2-24	-0.832899128	-4.12E-16	-3.239001594	0.00195132	0.035859809	-1.468731581
VWF_degree	0.831713645	-4.18E-17	3.233592718	0.001983031	0.035859809	-1.483104467
complement activation, classical pathway	-0.827292639	2.59E-16	-3.213456675	0.002105395	0.037295572	-1.536465653
EML6	-0.819708824	1.86E-17	-3.179043268	0.002331093	0.04023955	-1.627126399
DTX3L_degree	0.818648695	7.28E-17	3.174245436	0.002364305	0.04023955	-1.639712034
F12_degree	0.815116658	1.34E-16	3.158282874	0.002478029	0.041364028	-1.681489091
APCS	-0.811194928	7.12E-17	-3.140599241	0.002609994	0.042275752	-1.727597772
ST13P5_degree	0.809921624	2.36E-17	3.134866746	0.002654167	0.042275752	-1.742505663
ZNF530_degree	0.809220807	1.28E-16	3.131713504	0.002678763	0.042275752	-1.75069777
RPIA	-0.80273098	-2.69E-16	-3.102576193	0.002916354	0.045196923	-1.826120111
serine-type endopeptidase activity	0.80138279	-1.64E-16	3.096537392	0.002968001	0.045196923	-1.841689004
APOA4_degree	0.798767184	-1.31E-16	3.084835374	0.003070524	0.045951981	-1.871796962
MMP28	-0.794407764	-1.62E-16	-3.065371836	0.003248409	0.047790149	-1.921693972
RFC1_degree	0.792004023	7.89E-17	3.054661157	0.003350357	0.048468497	-1.949055452
complement activation	-0.771595857	-1.54E-16	-2.96432415	0.004336859	0.061557179	-2.17706775
ORM1/ORM2	0.770490772	-3.82E-18	2.959462495	0.004396941	0.061557179	-2.189197052
C9_degree	0.768973812	4.88E-17	2.9527938	0.004480614	0.061732898	-2.20581095
TDRD1_degree	0.765651735	-1.18E-16	2.938209505	0.004668781	0.063320339	-2.242049108
OPHN1	-0.762824504	-1.31E-17	-2.925819001	0.004834377	0.063777648	-2.272732304
WHAMM	-0.760648128	-2.17E-16	-2.916294203	0.004965358	0.063777648	-2.296253849
antigen binding	-0.760507719	-9.07E-17	-2.915680106	0.004973915	0.063777648	-2.297768415
XDH_degree	0.760139678	-5.75E-17	2.914070658	0.004996406	0.063777648	-2.30173673
other organism cell	0.758357647	-3.76E-17	2.906282453	0.005106576	0.064239245	-2.320916661
EML6_degree	0.755751992	5.84E-17	2.894908483	0.005271517	0.065366814	-2.348858729
PZP,A2M	-0.752785459	2.11E-16	-2.88197909	0.005464997	0.066580843	-2.380522896
MRPL45_degree	0.750983512	5.23E-17	2.874135716	0.005585548	0.066580843	-2.399679843
GCN1_degree	0.75077658	-1.58E-16	2.873235493	0.005599541	0.066580843	-2.401876085
RFC1	-0.747022938	-1.41E-16	-2.856923513	0.005858764	0.068721714	-2.441582656
LBP_degree	0.74301577	-7.97E-17	2.839546426	0.006147075	0.070014594	-2.483695274
LILRB4	-0.742317338	7.17E-16	-2.836521521	0.006198581	0.070014594	-2.491006254
membrane attack complex	0.742150081	6.17E-18	2.835797297	0.006210972	0.070014594	-2.492755782
HIVEP3_degree	0.740952965	6.04E-17	2.830615709	0.006300291	0.070110934	-2.505263265
RGS8	-0.737645751	1.71E-16	-2.816318056	0.006552933	0.071999314	-2.539685845
LILRB4_degree	0.732254144	-6.39E-18	2.793063236	0.006983867	0.075774955	-2.595391477
CFHR1_degree	0.73021954	-1.01E-16	2.784304939	0.00715282	0.076649976	-2.616280564
platelet activation	0.727213403	-1.21E-16	2.771381689	0.007408994	0.078426913	-2.647012063
WHAMM_degree	0.724900135	1.27E-16	2.761450926	0.00761155	0.078807158	-2.670553281
C4B_degree	-0.724731552	2.36E-17	-2.760727674	0.007626499	0.078807158	-2.672265252
PARD3_degree	0.715224855	4.19E-17	2.720044638	0.008512108	0.086923643	-2.76800965
C7	-0.713279055	9.55E-17	-2.711742343	0.008704034	0.08782311	-2.787414029
A2M	-0.712294782	6.75E-16	-2.70754582	0.008802547	0.08782311	-2.797204846
ST8SIA1_degree	0.710419256	-4.73E-17	2.699555213	0.008992953	0.088681476	-2.815815148
DOK5_degree	0.709448399	-7.71E-17	2.695421914	0.009092916	0.088681476	-2.825424991
heparin binding	0.707907495	9.01E-17	2.688865903	0.00925356	0.089245444	-2.840644191
IGHV3-72	-0.70672968	4.39E-16	-2.683858162	0.00937801	0.089451785	-2.852249853
APOM_degree	0.705157025	-3.60E-17	2.677176326	0.009546447	0.090068648	-2.867709142
CAMKK1	-0.701013488	2.69E-16	-2.659596764	0.010002883	0.093360242	-2.908238479
APOC2,APOE,C9	0.698835222	-1.23E-16	2.650369797	0.010250344	0.094652114	-2.929427741
SART1	-0.697369867	6.55E-17	-2.644168311	0.010419789	0.095203962	-2.943636809
defense response to bacterium	-0.694946909	2.24E-16	-2.633924101	0.010705295	0.095263738	-2.967051647
AGT/C3	-0.694455519	-2.31E-17	-2.631848016	0.010764018	0.095263738	-2.971788205
FGA_degree	0.693360822	8.27E-17	2.627224828	0.010895841	0.095263738	-2.98232542
ST8SIA1	0.692717836	7.81E-17	2.624510498	0.010973919	0.095263738	-2.988505173
LPA_degree	0.692431529	4.21E-17	2.623302142	0.011008842	0.095263738	-2.99125464
C4BPA	0.691811205	7.74E-16	2.620684668	0.011084836	0.095263738	-2.997206975
acute-phase response	0.690868215	2.97E-17	2.61670722	0.011201229	0.095320264	-3.006243056
ZNF672_degree	0.689259593	-6.39E-17	2.60992646	0.011402224	0.096088645	-3.021622892
TTR_degree	0.684520505	-8.89E-17	2.589981003	0.012012611	0.100079633	-3.066679963
ITIH4	0.683531555	-3.91E-16	2.585824611	0.012143487	0.100079633	-3.076034945
SERPINA1	0.682074078	1.22E-16	2.579702715	0.012338612	0.100079633	-3.089792129
PDPR	-0.681894397	-3.00E-17	-2.57894829	0.012362854	0.100079633	-3.091485695
IGHV3-35	-0.68123401	4.05E-17	-2.576176108	0.012452305	0.100079633	-3.097705437
DGKK_degree	0.680182028	1.44E-17	2.571761906	0.012595951	0.100305375	-3.107598318
CD5L	-0.678475964	-2.79E-16	-2.564607893	0.012831953	0.101255773	-3.123602945
vWF-GPIb complex	0.677121025	1.98E-17	2.558930432	0.013022091	0.101830403	-3.136279105
AGT_degree	0.67425016	7.34E-17	2.546913131	0.013432998	0.103602257	-3.16303663
APOA2	-0.673875831	4.79E-16	-2.545347427	0.013487391	0.103602257	-3.166515419
VWF	0.672969321	-8.70E-17	2.541556923	0.013619899	0.103702386	-3.174930359
APOH_degree	0.669363103	-1.46E-16	2.526493986	0.014158193	0.106863577	-3.208271245
ZNF426	-0.667678264	-4.64E-17	-2.519465348	0.014415894	0.107870655	-3.223774498
SART1_degree	0.665283536	1.41E-16	2.509484879	0.014789108	0.109717487	-3.245729254
PRICKLE2_degree	0.660523442	7.84E-17	2.489679598	0.015555662	0.113765958	-3.28908919
IGHV4-39	-0.660012378	-7.71E-18	-2.487555839	0.015639952	0.113765958	-3.293722361
extracellular exosome	0.659480978	-1.83E-16	2.485348104	0.015728013	0.113765958	-3.298535357
GFI1_degree	0.658315713	-6.82E-17	2.480508851	0.015922602	0.114221641	-3.309073181
FLOT2	-0.657298466	5.76E-17	-2.476286444	0.016094157	0.114492694	-3.318254253
IGHV3-64	-0.656533571	5.92E-17	-2.473112815	0.016224195	0.114492694	-3.32514659
GPX3	0.651848054	3.18E-16	2.453696557	0.017040574	0.119284019	-3.367158332
IGHV3-38	-0.649761696	-9.64E-17	-2.445064364	0.017415245	0.119705734	-3.38575006
AGT	-0.648798146	-3.18E-16	-2.441080507	0.017590644	0.119705734	-3.394312438
endoplasmic reticulum lumen	0.648776349	-3.80E-16	2.440990406	0.01759463	0.119705734	-3.394505957
APOH	-0.648460528	8.31E-17	-2.439685018	0.017652458	0.119705734	-3.397309038
TSPOAP1	-0.646884642	-1.45E-16	-2.433174193	0.017943446	0.120676311	-3.41127165
PCSK4	-0.64618661	1.72E-16	-2.430291739	0.018073641	0.120676311	-3.417443454
GC	0.643565116	-1.75E-15	2.419474691	0.018569821	0.122754999	-3.440551429
retinoid metabolic process	-0.642422979	4.56E-17	-2.414765913	0.018789605	0.122754999	-3.450584352
CCDC54_degree	0.642190001	2.67E-17	2.413805694	0.018834708	0.122754999	-3.45262832
IGA2_degree	0.641593259	-1.65E-16	2.411346678	0.018950657	0.122754999	-3.457859676
PEBP1_degree	0.640816186	3.00E-17	2.408145562	0.019102555	0.122822353	-3.464663272
C4BPB	0.635287066	5.53E-16	2.385400735	0.020213611	0.129010396	-3.512791933
SZT2	-0.632217378	-9.28E-17	-2.372797306	0.020853846	0.132125099	-3.539299979
THEG_degree	0.629178522	3.70E-17	2.360337309	0.021504541	0.135260446	-3.565392948
ZACN	-0.625417851	3.19E-16	-2.344940736	0.022333578	0.138834752	-3.597479258
APOD/AZGP1	0.625154202	1.27E-16	2.343862281	0.022392702	0.138834752	-3.599720261
APCS_degree	0.621910273	-8.10E-17	2.330603126	0.023131082	0.142395595	-3.627202853
IGKV3-20	-0.620853734	4.05E-16	-2.326288689	0.023375976	0.142889768	-3.636117702
TMEM185A	-0.618680221	6.46E-18	-2.317419217	0.023886677	0.14349768	-3.654401586
LHX4_degree	0.618370436	9.48E-17	2.316155755	0.023960229	0.14349768	-3.657001426
JAK2/JCHAIN	-0.618323511	1.05E-16	-2.315964383	0.023971387	0.14349768	-3.657395113
ZNF268_degree	0.608718268	8.47E-17	2.27687307	0.02634974	0.156654616	-3.737245807
APOC1_degree	0.607945385	1.22E-16	2.273734534	0.026549463	0.156768261	-3.743607696
GCN1	0.606621142	6.54E-17	2.268359412	0.026894629	0.157733367	-3.754486179
IGHG4,IGHG1,IGHG3,IGHG2,APOD,AZGP1	-0.596406577	-1.72E-16	-2.226998387	0.02968611	0.172936532	-3.83747333
OR1I1	-0.594718651	-1.07E-16	-2.22018048	0.030169996	0.173570471	-3.8510297
CIT_degree	0.594632523	-5.20E-17	2.219832716	0.030194863	0.173570471	-3.851720238
KLHL15	-0.592649568	-4.74E-16	-2.211829452	0.030772148	0.174697961	-3.867586754
ZNF268	-0.592576706	-9.74E-17	-2.211535502	0.030793535	0.174697961	-3.868168592
external side of plasma membrane	-0.589892264	-3.33E-16	-2.200711697	0.031590193	0.178053818	-3.889547565
APOM	-0.588016848	2.90E-16	-2.193156956	0.032156923	0.180078771	-3.904417056
ST13P5	-0.587273253	-1.21E-16	-2.190163129	0.032383969	0.180187723	-3.910297647
C3_degree	0.586467384	0	2.186919591	0.032631539	0.180408763	-3.916661062
APOC2/APOE	0.580731684	-2.24E-17	2.163864477	0.034439629	0.187867123	-3.961661976
GC_degree	0.580465006	6.26E-17	2.162793838	0.034525685	0.187867123	-3.963741908
PCSK4_degree	0.580055702	3.19E-17	2.161150811	0.034658115	0.187867123	-3.966932118
IGHV7-4-1	-0.579476241	-3.04E-16	-2.158825203	0.034846321	0.187867123	-3.97144415
DNAJC25_degree	-0.577516172	-8.12E-17	-2.15096265	0.03548926	0.189988677	-3.986668107
high-density lipoprotein particle assembly	-0.576319723	5.27E-18	-2.146166271	0.035886545	0.189988677	-3.995931939
MARK1_degree	0.575950232	5.14E-19	2.144685498	0.036009981	0.189988677	-3.998788378
C8B	0.575281594	-5.82E-16	2.142006419	0.036234249	0.189988677	-4.003952107
positive regulation of cholesterol esterification	-0.574984585	2.14E-16	-2.140816598	0.03633424	0.189988677	-4.006243637
ZACN_degree	0.570540772	7.97E-18	2.123031301	0.037857879	0.194030401	-4.040367651
IGHG3/IGHG2	0.570130027	-5.17E-17	2.121388959	0.038001346	0.194030401	-4.043506493
IGHG3/APOD	0.570130027	-5.17E-17	2.121388959	0.038001346	0.194030401	-4.043506493
IGHG3/AZGP1	0.570130027	-5.17E-17	2.121388959	0.038001346	0.194030401	-4.043506493
GSN_degree	-0.56848259	-1.28E-16	-2.114804436	0.038581307	0.195839616	-4.05606997
DTX3L	-0.566984864	1.86E-16	-2.10882196	0.039114909	0.197393842	-4.067455746
C1R/C1RL	0.563042523	-2.98E-17	2.093091427	0.040548737	0.203446841	-4.097262006
FTCD_degree	-0.560274431	-7.66E-17	-2.082060648	0.041581228	0.207428197	-4.118048886
LPA	0.559140578	-1.26E-16	2.077545662	0.042010371	0.208371442	-4.126529893
C15orf61	0.558496474	-7.00E-16	2.074981727	0.042255776	0.208397803	-4.13133897
TOPBP1	0.556795693	-1.63E-16	2.068214584	0.042909464	0.210396065	-4.144007291
signaling receptor binding	-0.556186205	-4.13E-16	-2.065790596	0.043145737	0.210396065	-4.148536409
ITIH4_degree	0.552506712	6.23E-17	2.05116886	0.044594991	0.215039875	-4.175759334
KNG1	-0.552329307	1.55E-15	-2.050464397	0.044665865	0.215039875	-4.177066698
VWF/GP1BA	0.551891261	-6.60E-17	2.048725144	0.044841264	0.215039875	-4.180292794
MAMDC2_degree	0.550966783	3.75E-17	2.045055465	0.045213297	0.215400451	-4.187091829
IGKV3-20_degree	-0.55047368	-6.72E-17	-2.043098638	0.045412768	0.215400451	-4.190713056
TMEM185A_degree	0.548533907	-9.56E-17	2.035404371	0.046204479	0.217807338	-4.204922679
NOX5	0.548005568	-5.14E-18	2.033309642	0.046422071	0.217807338	-4.208783149
PRICKLE2	0.546142907	3.24E-16	2.025927973	0.04719591	0.220149046	-4.222359715
KIF1A_degree	0.545588134	1.07E-17	2.023730415	0.047428423	0.220149046	-4.226393258
CRYBG3_degree	0.544915681	-7.65E-17	2.021067317	0.047711516	0.220285083	-4.231276199
BCHE,FBLN1,DEFA1,COCH,SERPINA6,SERPINA1	0.542732761	-1.80E-17	2.012426944	0.048640048	0.223383925	-4.24708039
high-density lipoprotein particle	0.540788427	-4.29E-17	2.004736823	0.049479501	0.224895721	-4.261097003
F9_degree	0.540770208	-2.67E-17	2.004664789	0.049487423	0.224895721	-4.261228077
PSME4_degree	-0.540157772	-5.71E-17	-2.002243676	0.049754313	0.224930957	-4.265631196
IGKV2-24_degree	0.539067043	-7.20E-17	1.997933104	0.05023255	0.225916337	-4.273459091
DEFA1/SERPINA6	0.537947982	7.26E-17	1.99351236	0.050727106	0.226964576	-4.281471808
DOK5	0.536821427	-3.65E-17	1.989063842	0.051228983	0.227702961	-4.289519265
USP45_degree	0.536402158	-1.86E-16	1.987408709	0.051416798	0.227702961	-4.292509434
CASR_degree	0.535128276	-9.39E-17	1.982381414	0.051990892	0.228223673	-4.301578465
FAM78B	0.534975177	-9.87E-17	1.981777377	0.052060239	0.228223673	-4.302666775
phosphatidylcholine-sterol O-acyltransferase activator activity	-0.531896677	-1.29E-16	-1.969638563	0.05347074	0.233229158	-4.324476242
HMCN1	-0.530053931	-1.17E-16	-1.962378925	0.054329827	0.235791448	-4.337463494
HMCN1_degree	0.526083225	-1.27E-17	1.946752404	0.056219142	0.242519842	-4.365276427
FTCD	-0.525248298	-1.97E-16	-1.943469415	0.056623119	0.242519842	-4.371094907
IGF2	0.524398615	1.46E-16	1.940129415	0.05703665	0.242519842	-4.377005593
CA10	-0.524326446	-3.91E-17	-1.939845773	0.057071887	0.242519842	-4.377507135
C4A_degree	0.523906752	-3.73E-17	1.938196424	0.057277152	0.242519842	-4.380422269
C9orf131_degree	-0.522125234	-1.13E-16	-1.931197995	0.058155134	0.24504202	-4.392767404
platelet alpha granule lumen	0.521117218	5.13E-16	1.927240115	0.058656721	0.245752315	-4.399731691
MTTP	0.520603527	-6.78E-17	1.9252237	0.058913677	0.245752315	-4.403274947
F10_degree	0.520086779	-1.88E-16	1.923195654	0.05917308	0.245752315	-4.406835354
C2	0.517281973	-1.90E-16	1.912194261	0.060597237	0.25046858	-4.42609171
HP	0.516177995	-6.82E-17	1.907867063	0.061165328	0.251140877	-4.433639199
complement activation, alternative pathway	0.515843007	4.63E-18	1.906554365	0.061338555	0.251140877	-4.435925827
APOA1_degree	0.514470227	-1.85E-17	1.901176519	0.062052584	0.252871562	-4.445279173
FGG_degree	0.511249012	1.14E-17	1.888567562	0.063754383	0.256962479	-4.467117734
UGT2B11_degree	-0.51081193	-4.11E-18	-1.886857753	0.063988166	0.256962479	-4.470069223
C2_degree	0.510607094	-6.90E-17	1.886056554	0.064097964	0.256962479	-4.471451449
MRPL45	0.510341382	1.02E-16	1.885017325	0.06424062	0.256962479	-4.473243549
STEAP3,APOA2	-0.507946049	7.20E-18	-1.875653214	0.065538193	0.260500738	-4.489352128
CFB_degree	-0.507603587	3.85E-18	-1.874315056	0.065725417	0.260500738	-4.491648295
IGF2_degree	0.506718498	2.63E-17	1.870857324	0.066211286	0.261233618	-4.497574757
ZNF177_degree	-0.505375793	4.16E-17	-1.865613855	0.066953866	0.26222222	-4.506543439
UGT2B11	-0.505173984	-1.19E-16	-1.864825965	0.067066052	0.26222222	-4.507889156
HIVEP3	-0.503199478	-2.89E-16	-1.857120118	0.068171655	0.265013365	-4.521024199
F9	0.502811609	-4.77E-17	1.855606998	0.068390546	0.265013365	-4.523597731
BASC complex (BRCA1-associated genome surveillance complex)	-0.500870888	6.42E-18	-1.848039043	0.069494247	0.267317478	-4.536441457
serine-type endopeptidase inhibitor activity	0.500684324	-1.06E-16	1.84731179	0.069601094	0.267317478	-4.53767324
SAA1_degree	0.49886361	1.56E-16	1.840216777	0.070650754	0.270153543	-4.549667788
ZNF177	-0.497989593	-2.75E-16	-1.836812432	0.071159109	0.270707737	-4.555408476
SERPINA1_degree	0.497543941	1.05E-16	1.835076975	0.071419438	0.270707737	-4.558331308
BRD3_degree	0.494979855	7.75E-17	1.82509697	0.072932069	0.275239285	-4.575091775
HP_degree	-0.494279484	5.09E-17	-1.822372457	0.073349651	0.275616872	-4.579653193
USP45	0.493108745	1.18E-16	1.817819585	0.074051937	0.277056386	-4.587262125
KIF1A	-0.490598284	7.47E-16	-1.808062655	0.075575938	0.277922308	-4.603511112
PLCB1_degree	-0.490077012	-1.14E-16	-1.806037745	0.075895489	0.277922308	-4.606873577
ORM1	0.489669095	-2.85E-16	1.804453414	0.076146299	0.277922308	-4.609502093
LILRB4,CLU	-0.489375834	3.57E-17	-1.803314532	0.076327019	0.277922308	-4.611390306
CFL1_degree	0.489067024	1.03E-17	1.802115384	0.07651769	0.277922308	-4.613377286
DDX51	-0.489007011	-1.14E-16	-1.801882359	0.076554788	0.277922308	-4.61376327
CA1	0.487738661	-1.32E-16	1.796958576	0.077342191	0.277922308	-4.621908625
FBLN1/DEFA1	-0.486997246	-3.39E-17	-1.794081328	0.077805439	0.277922308	-4.626659199
FBLN1/COCH	-0.486997246	-3.39E-17	-1.794081328	0.077805439	0.277922308	-4.626659199
FBLN1/SERPINA6	-0.486997246	-3.39E-17	-1.794081328	0.077805439	0.277922308	-4.626659199
FBLN1/SERPINA1	-0.486997246	-3.39E-17	-1.794081328	0.077805439	0.277922308	-4.626659199
HYDIN	-0.485265201	2.14E-16	-1.78736241	0.078896233	0.280366544	-4.637726178
TF_degree	0.484887474	6.44E-17	1.785897644	0.079135718	0.280366544	-4.640133916
C3/APOA1	0.484321074	1.86E-17	1.783701575	0.079495905	0.280497744	-4.643740438
IGHV3-13_degree	-0.480737138	1.58E-17	-1.769815164	0.081805229	0.287477485	-4.66645352
TAS1R3_degree	0.479581586	1.11E-16	1.765341272	0.082561019	0.288963567	-4.673737268
C1S	0.477528408	-1.37E-15	1.7573962	0.083917505	0.292531704	-4.686631507
HBB_degree	0.476521906	-8.09E-17	1.753503308	0.084588871	0.293692559	-4.692930303
SERPINA6/SERPINA1	0.474438686	-2.08E-17	1.745449929	0.085991893	0.296597208	-4.705921015
CES2/SERPINF2	-0.474266214	-2.83E-16	-1.744783423	0.086108867	0.296597208	-4.706993731
extracellular space	0.470749197	-7.36E-17	1.731200095	0.088521628	0.303702661	-4.728775214
negative regulation of endopeptidase activity	0.469759509	3.06E-17	1.727380478	0.089210068	0.304859604	-4.734872518
SAA1/YLPM1	0.467056077	-6.51E-18	1.71695288	0.09111205	0.306617014	-4.751456389
ZNF530	-0.46692768	3.55E-17	-1.716457848	0.091203168	0.306617014	-4.752241426
IGHV7-4-1_degree	0.466874728	-5.03E-17	1.7162537	0.091240766	0.306617014	-4.752565111
SMN1	-0.466709898	7.30E-17	-1.715618248	0.09135788	0.306617014	-4.753572424
ORM2	-0.466523361	8.36E-16	-1.714899144	0.09149056	0.306617014	-4.754711934
MRC1	0.465474447	-4.11E-17	1.710856359	0.092239445	0.30793784	-4.761110205
APOC1	0.464459261	4.07E-16	1.706944832	0.092968811	0.309183633	-4.767287757
RBP4	-0.463383776	-2.06E-16	-1.702802321	0.093746415	0.310579725	-4.773816174
KLHL15_degree	-0.461777644	-1.33E-17	-1.696618461	0.094917147	0.313262674	-4.783534978
BNC2_degree	-0.459229542	4.82E-17	-1.686814169	0.096797886	0.318259715	-4.798878205
ZNF672	0.457316401	8.53E-17	1.679458062	0.098228963	0.321312879	-4.810337251
TMCC3_degree	-0.457000489	-1.55E-17	-1.678243783	0.09846685	0.321312879	-4.812224441
ATRN_degree	0.455343801	7.90E-17	1.671877846	0.099721713	0.32418894	-4.822097895
RPIA,IGKC	-0.454510597	-4.83E-16	-1.66867742	0.100357507	0.325038494	-4.827048837
CNDP1	0.45220725	-1.08E-17	1.659834225	0.102131523	0.327498291	-4.840684147
negative regulation of proteolysis	0.452166901	-9.38E-18	1.659679371	0.102162815	0.327498291	-4.84092233
B4GALT2_degree	0.451724082	1.41E-16	1.657979995	0.102506723	0.327498291	-4.843534834
ERF	-0.451570522	2.00E-16	-1.657390738	0.102626192	0.327498291	-4.84444015
LRG1	0.450796588	-5.46E-16	1.654421348	0.103229955	0.328218318	-4.848997772
innate immune response	-0.447655044	-2.61E-16	-1.642375123	0.10570905	0.334527706	-4.867410873
HIPK1	-0.447016779	4.11E-17	-1.639929088	0.106218307	0.334527706	-4.871134767
TSPOAP1_degree	0.445900262	5.14E-18	1.635651359	0.107113708	0.334527706	-4.877635117
CLU_degree	0.445714705	2.71E-17	1.63494057	0.10726308	0.334527706	-4.878713719
reverse cholesterol transport	-0.445647131	7.76E-17	-1.634681734	0.107317517	0.334527706	-4.879106389
CDH1/FLOT2	0.445387633	-4.00E-17	1.633687795	0.107526763	0.334527706	-4.880613729
TTN_degree	0.444704922	3.04E-17	1.631073212	0.108078771	0.335044191	-4.884574836
BCHE/DEFA1	-0.442111944	7.56E-17	-1.621147702	0.110195275	0.340389676	-4.899559351
PLEKHH2_degree	0.440402706	-8.40E-17	1.614609164	0.111607793	0.343530371	-4.909384952
PZP_degree	0.436455396	-5.80E-17	1.599521612	0.114923051	0.352484836	-4.931918843
ITIH3	-0.43426818	5.60E-16	-1.591169028	0.11679228	0.356381704	-4.944310534
APOA1	-0.434009677	-4.94E-16	-1.590182203	0.11701473	0.356381704	-4.945770641
PSME4	0.432496594	-1.14E-15	1.584407538	0.118323296	0.359107066	-4.954298197
F9/ERF	0.431960948	-3.39E-17	1.582363854	0.118789213	0.359264937	-4.957309333
C8B_degree	-0.430976735	2.89E-17	-1.578609548	0.119648956	0.360206276	-4.962831588
PROS1,C4BPB	0.430418706	-4.19E-17	1.576481404	0.12013852	0.360206276	-4.96595656
PARD3	-0.429637139	2.15E-17	-1.573501328	0.120826764	0.360206276	-4.970326011
C4BPA_degree	0.429354776	0	1.572424857	0.12107615	0.360206276	-4.971902492
MRPL19/MRPL45	-0.428697685	1.09E-18	-1.56992012	0.121658019	0.360206276	-4.975566818
PPP2R1A_degree	0.428342114	1.57E-17	1.568564934	0.121973771	0.360206276	-4.977547165
GPX3_degree	-0.428012282	-1.26E-16	-1.567307963	0.122267227	0.360206276	-4.979382584
FAM71D	0.427840433	1.98E-16	1.566653106	0.122420336	0.360206276	-4.980338267
RFC1/RAD50	-0.426425406	-3.06E-17	-1.56126214	0.123686611	0.36270263	-4.988191769
ITPR3_degree	0.424312399	-3.81E-17	1.553216036	0.125596014	0.366017272	-4.999866969
APOD_degree	0.424241676	-9.05E-17	1.552946811	0.125660308	0.366017272	-5.000256665
YAP1	0.423018369	-8.84E-17	1.548290878	0.126776361	0.368033047	-5.006986187
TFB2M_degree	0.421092295	3.03E-17	1.540963445	0.128548787	0.370891826	-5.017539335
STEAP3_degree	0.421019962	-5.57E-17	1.540688344	0.128615714	0.370891826	-5.017934644
IGHA2/JCHAIN	-0.419338945	-9.52E-17	-1.534296549	0.130178535	0.374155526	-5.027101102
SMG5_degree	0.418066231	-9.25E-18	1.529459251	0.131371288	0.375858572	-5.034014915
Polycystin-1-E-cadherin-beta-catenin-Flotillin-2 complex	-0.417783786	1.13E-17	-1.528385975	0.131637104	0.375858572	-5.035546189
EHBP1L1_degree	-0.416457631	1.84E-16	-1.523347777	0.132890617	0.378193624	-5.042721086
IGHA1_degree	-0.415585902	1.22E-16	-1.520036996	0.13371949	0.378339841	-5.047424068
SAA4_degree	0.415487031	-1.14E-16	1.51966154	0.133813746	0.378339841	-5.047956809
HIPK1_degree	0.414035332	-7.32E-17	1.514149984	0.135203457	0.381027926	-5.055763269
FCMR_degree	0.412965776	1.23E-16	1.510090687	0.136234279	0.382690468	-5.061496027
MTA1_degree	-0.412197691	-3.39E-17	-1.507176305	0.136978188	0.383538926	-5.065603106
CHST4_degree	-0.409436289	-6.68E-17	-1.496703622	0.13967792	0.387650543	-5.080301142
cholesterol efflux	-0.408719054	-8.57E-17	-1.493984778	0.140385625	0.387650543	-5.084101441
IGHV3-35_degree	-0.408651	-3.07E-17	-1.493726835	0.140452914	0.387650543	-5.084461653
FMN2	-0.408583498	-1.16E-16	-1.493470982	0.140519681	0.387650543	-5.084818888
F9,ERF,SERPINA7	0.408319644	-2.24E-16	1.492470956	0.140780891	0.387650543	-5.086214634
C8A	0.407971368	-3.00E-16	1.491151068	0.141126235	0.387650543	-5.088055491
ORM2_degree	0.406995778	-3.47E-17	1.487454468	0.142096989	0.389085761	-5.093203136
F5_degree	0.405708325	8.22E-18	1.482577684	0.1433857	0.391379836	-5.099976125
SERPINF2	0.405147618	-9.65E-16	1.48045429	0.14394968	0.391687531	-5.102918704
SERPINA3	0.404316672	-5.46E-16	1.477308092	0.144788524	0.392738871	-5.107271489
TMEM185A,FYN	-0.403115879	1.26E-16	-1.472762786	0.146007172	0.394810671	-5.113544785
TF	-0.400493162	6.38E-16	-1.462840204	0.148695475	0.399244359	-5.127177323
FMN2_degree	-0.399173541	2.26E-17	-1.457850267	0.150061949	0.399244359	-5.134000618
IGHG2	-0.399007986	9.21E-16	-1.457224371	0.150234038	0.399244359	-5.134854947
SPTBN5	-0.398600147	3.83E-17	-1.455682611	0.150658602	0.399244359	-5.136957948
SERPINA3_degree	0.398292197	-9.77E-17	1.454518574	0.150979771	0.399244359	-5.138544354
SERPINC1/SUCLG1	0.397648107	-5.23E-17	1.45208425	0.151653152	0.399244359	-5.141858158
SERPINC1/TEX15	0.397648107	-5.23E-17	1.45208425	0.151653152	0.399244359	-5.141858158
COL8A1/C1QC	0.397644398	-3.72E-17	1.452070234	0.151657036	0.399244359	-5.141877223
PROS1_degree	0.397520859	1.65E-16	1.451603368	0.15178645	0.399244359	-5.142512164
CFL1	0.396377089	-5.65E-17	1.447281675	0.152988509	0.400363968	-5.14838069
LCAT	0.396238532	7.20E-17	1.446758231	0.153134605	0.400363968	-5.149090381
C1QB/C1QC	0.394536521	4.01E-18	1.440329878	0.154937676	0.40386157	-5.157786549
very-low-density lipoprotein particle	-0.393038045	9.62E-17	-1.434672624	0.156538096	0.406811578	-5.165409773
chylomicron remodeling	-0.392192787	1.04E-16	-1.431482459	0.157446233	0.40775685	-5.169696246
KLKB1_degree	0.391656227	-1.12E-16	1.429457745	0.158024724	0.40775685	-5.172412147
PPP2R1A	0.391283159	4.93E-17	1.428050135	0.15842787	0.40775685	-5.17429817
55S ribosome, mitochondrial	0.390601952	2.03E-16	1.425480248	0.159165956	0.40775685	-5.177737035
GLRB_degree	0.390260305	-8.28E-17	1.424191539	0.159537083	0.40775685	-5.179459334
IGHV6-1_degree	-0.390091743	3.32E-17	-1.423555755	0.159720425	0.40775685	-5.180308494
phospholipid efflux	-0.388405259	9.51E-17	-1.41719619	0.161563343	0.410615389	-5.188782946
HPX	-0.388202238	-1.62E-16	-1.416430801	0.161786248	0.410615389	-5.189800481
spherical high-density lipoprotein particle	-0.387580989	-1.18E-16	-1.414088949	0.162469745	0.411147927	-5.192910638
TMCC3	-0.386511317	-1.46E-16	-1.410057602	0.163651569	0.411481521	-5.198253324
PEBP1	0.385941199	1.03E-18	1.407909405	0.164284038	0.411481521	-5.201094484
APOA2_degree	0.38557568	1.24E-16	1.406532301	0.164690474	0.411481521	-5.202913685
PROZ	0.384980011	-2.20E-16	1.404288374	0.165354406	0.411481521	-5.205874428
BCHE/SERPINA1	-0.384967213	4.99E-17	-1.404240168	0.165368692	0.411481521	-5.205937986
YAP1_degree	0.384575035	8.22E-18	1.402762995	0.165806911	0.411481521	-5.207884566
IGHM/APOA1	0.383726338	9.65E-17	1.39956681	0.166758159	0.411481521	-5.212089865
endocytic vesicle lumen	0.383214687	-2.72E-16	1.39764027	0.167333563	0.411481521	-5.214620332
very-low-density lipoprotein particle remodeling	-0.382952526	4.56E-18	-1.396653242	0.167628952	0.411481521	-5.215915509
C1RL	-0.38279953	3.19E-16	-1.396077246	0.167801517	0.411481521	-5.216670935
STEAP3	-0.382786521	8.69E-17	-1.39602827	0.167816196	0.411481521	-5.216735155
RASIP1	-0.381298496	1.49E-16	-1.390427369	0.169501439	0.414094253	-5.22406538
PRPH2_degree	0.381003737	-7.88E-17	1.389318152	0.169836727	0.414094253	-5.225513809
Fibrinogen complex	0.380507236	6.64E-17	1.387449938	0.170402592	0.414094253	-5.2279509
MRC1_degree	0.380167988	2.17E-17	1.386173563	0.170790026	0.414094253	-5.229614172
MARK1	0.379317404	-2.31E-17	1.38297383	0.171764253	0.414106946	-5.233777517
APOL1_degree	0.379228547	-8.74E-18	1.382639608	0.17186626	0.414106946	-5.234211872
C1QA_degree	-0.378675678	-1.34E-17	-1.380560234	0.172501941	0.414106946	-5.23691202
HBB	0.378480238	1.51E-16	1.379825239	0.172727065	0.414106946	-5.23786553
F9/SERPINA7	0.378087007	-1.44E-16	1.378346521	0.17318067	0.414106946	-5.239782432
MYRIP_degree	0.37715796	1.43E-16	1.374853478	0.174255802	0.414568841	-5.244302915
GVINP1	-0.377094805	1.87E-16	-1.374616057	0.174329063	0.414568841	-5.244609781
platelet degranulation	0.37631136	-3.60E-16	1.371671127	0.175239746	0.415595901	-5.248411967
RASIP1_degree	0.374150705	-7.97E-18	1.363552291	0.177769235	0.419479174	-5.25885459
F12	-0.374087433	3.00E-16	-1.363314608	0.177843705	0.419479174	-5.259159428
KLKB1	0.372775385	4.34E-16	1.358386675	0.179393069	0.420145879	-5.265468462
PROS1/C4BPB	-0.372524485	-9.49E-17	-1.357444498	0.179690462	0.420145879	-5.266672254
AP5M1	-0.372176396	2.27E-16	-1.356137455	0.180103644	0.420145879	-5.268340926
CCDC181_degree	-0.372116998	1.08E-16	-1.355914432	0.180174218	0.420145879	-5.268625504
IFT46_degree	0.371696997	7.55E-17	1.354337537	0.180673817	0.420145879	-5.270636372
F10	0.371397575	-1.17E-16	1.353213454	0.181030597	0.420145879	-5.272068471
PLEKHH2	-0.370502018	-3.86E-16	-1.34985187	0.182100752	0.420615136	-5.27634452
IGHV6-1	-0.370417529	-3.78E-17	-1.349534771	0.182201948	0.420615136	-5.276747367
IGHM_degree	0.367088995	8.48E-17	1.337047394	0.186221111	0.428753115	-5.292540761
IGHG3_degree	0.364766146	-7.77E-17	1.328338922	0.18906351	0.433027066	-5.303473112
GCK	0.364611871	-1.77E-16	1.327760709	0.189253391	0.433027066	-5.304196604
FCMR	-0.364351582	1.61E-17	-1.326785215	0.189574061	0.433027066	-5.305416526
SERPINF1_degree	0.361870569	2.03E-16	1.317490061	0.192650231	0.438086464	-5.316998417
FAM78B_degree	0.361606695	6.50E-17	1.316501781	0.192979496	0.438086464	-5.318225321
regulation of cholesterol transport	-0.360988283	6.28E-17	-1.314185892	0.193752737	0.438086464	-5.321096989
PZP/A2M	0.360841651	8.99E-19	1.313636819	0.193936406	0.438086464	-5.321777133
IGHA1	-0.360541669	5.10E-16	-1.312513582	0.194312545	0.438086464	-5.323167668
C1QB	0.358763284	4.16E-16	1.305856317	0.196553138	0.441989957	-5.331386166
NELFA	-0.357318364	7.19E-16	-1.300449414	0.198387133	0.444297082	-5.33803208
INPP5D_degree	0.357149043	3.47E-18	1.299815935	0.198602843	0.444297082	-5.338809021
TTC27_degree	0.356745048	-8.99E-19	1.298304573	0.199118196	0.444304869	-5.340661216
PDPR_degree	0.356288522	2.35E-17	1.296596859	0.199701707	0.444464312	-5.342751597
CFH	0.354698003	1.46E-15	1.290648681	0.201744142	0.447861676	-5.350012381
DGKK	-0.351647694	-1.47E-16	-1.279247387	0.205702591	0.455484308	-5.36384152
LHX4	-0.350447192	2.52E-16	-1.27476242	0.207275494	0.45779931	-5.369249766
CHST4	0.349927106	-6.73E-17	1.272819809	0.207959548	0.458144385	-5.371586713
SZT2_degree	0.349032576	-5.60E-17	1.269479131	0.209139827	0.458693336	-5.375597644
LUM	-0.348931736	8.28E-17	-1.269102578	0.209273177	0.458693336	-5.376049121
ARHGAP33	-0.348538262	-2.17E-16	-1.267633376	0.209794072	0.458693336	-5.377809445
receptor-mediated endocytosis	-0.348118921	6.42E-16	-1.266067736	0.210350217	0.458753739	-5.379683192
COL8A1_degree	0.344593246	-4.46E-17	1.252910268	0.215067259	0.467865616	-5.395343365
COCH/SERPINA6	0.343422188	-6.17E-18	1.248542326	0.216650346	0.469461208	-5.400507893
APOA1/FN1	-0.343251017	8.64E-17	-1.247903971	0.216882424	0.469461208	-5.401261233
CP	0.341815683	-2.05E-15	1.242552079	0.218835362	0.471107227	-5.407562794
C6	0.340957022	1.45E-16	1.239351235	0.22000954	0.471107227	-5.411319346
HERC3	0.340067082	7.20E-17	1.236034442	0.221231133	0.471107227	-5.415202284
NELFA_degree	0.33990879	-2.06E-17	1.235444561	0.22144891	0.471107227	-5.415891819
FCN3	0.339879379	-3.54E-16	1.235334961	0.22148939	0.471107227	-5.416019899
PRPH2/NCAM1	0.338862572	-6.48E-17	1.231546304	0.222892061	0.471107227	-5.420440791
LCAT_degree	0.338560198	-3.14E-17	1.23041981	0.223310376	0.471107227	-5.421752784
C4B	0.338236091	4.19E-16	1.22921244	0.223759362	0.471107227	-5.423157706
IGHG1/IGHG3	-0.337950253	-5.00E-17	-1.2281477	0.224155858	0.471107227	-5.424395576
IGHG1/IGHG2	-0.337950253	-5.00E-17	-1.2281477	0.224155858	0.471107227	-5.424395576
IGHG1/APOD	-0.337950253	-5.00E-17	-1.2281477	0.224155858	0.471107227	-5.424395576
IGHG1/AZGP1	-0.337950253	-5.00E-17	-1.2281477	0.224155858	0.471107227	-5.424395576
PROC_degree	0.336492363	1.62E-17	1.222718138	0.226185762	0.474225222	-5.43069216
TMEM185A/FYN	-0.335970778	7.99E-17	-1.220776047	0.226915091	0.474607949	-5.432937943
ITIH2	0.334472515	6.51E-17	1.215198586	0.229019191	0.477854259	-5.439368721
APOC2/C9	-0.334083133	-8.70E-17	-1.213749367	0.229568233	0.477854259	-5.441035083
ERF/SERPINA7	-0.333006175	-3.68E-17	-1.20974174	0.231091531	0.47987428	-5.445633351
PRPH2	0.330113599	1.27E-16	1.198982397	0.235217532	0.487276414	-5.457906872
STEAP3/APOA2	-0.329391066	1.23E-17	-1.196295889	0.236256046	0.487389012	-5.460955184
LAMP5_degree	-0.329294626	5.24E-17	-1.195937336	0.236394901	0.487389012	-5.461361532
BRCA1-BARD1-BACH1-DNA damage complex II	0.327037319	1.54E-17	1.187547126	0.239661049	0.49203349	-5.470837067
MRPS34/MRPL45	-0.326954618	5.35E-17	-1.18723981	0.239781298	0.49203349	-5.47118293
SERPING1_degree	0.326206762	-1.68E-16	1.184461041	0.24087057	0.49310296	-5.474306376
YAE1	0.325785238	2.47E-17	1.182895001	0.241486027	0.493199697	-5.476063596
NOX5_degree	0.324635252	6.17E-18	1.178623305	0.243170577	0.494932363	-5.480845509
APOD	0.324325244	3.76E-16	1.177471942	0.243626064	0.494932363	-5.482131573
regulation of complement activation	-0.323657122	-9.59E-18	-1.174990802	0.244609707	0.494932363	-5.484898914
KLRC4_degree	0.323653404	1.05E-16	1.174976996	0.244615188	0.494932363	-5.484914296
FBXL20	-0.32255949	1.59E-16	-1.170915399	0.246231588	0.497044229	-5.489432339
LBP	-0.321829631	2.94E-16	-1.168206025	0.2473141	0.49725263	-5.492437899
IPMK	-0.321717585	6.99E-17	-1.167790125	0.247480572	0.49725263	-5.492898676
IGHG4_degree	-0.319578056	7.33E-17	-1.159850372	0.25067404	0.502398518	-5.50166515
Carboxypeptidase N	0.318982988	5.78E-17	1.157642718	0.251567203	0.502398518	-5.504092534
SMN1_degree	-0.318842716	-4.27E-17	-1.157122357	0.251778059	0.502398518	-5.504664044
CFHR1	0.318261007	-8.50E-17	1.154964594	0.252653758	0.502989591	-5.507031287
BTD	0.3174829	7.09E-17	1.152078727	0.253828344	0.50355768	-5.510190724
IVD	0.317303698	8.48E-17	1.151414162	0.254099382	0.50355768	-5.510917218
CFP_degree	-0.315597715	1.03E-18	-1.145088824	0.256689461	0.507531782	-5.517811955
TTC27	-0.3130156	-3.05E-16	-1.135519248	0.260643601	0.514178739	-5.528173966
PLTP_degree	-0.312094125	-3.55E-17	-1.132105397	0.2620646	0.515809689	-5.531850388
FGG	0.309105945	1.13E-17	1.121039283	0.266708498	0.52376239	-5.543694814
TOPBP1/RAD50	0.308276828	7.25E-17	1.117970006	0.26800674	0.525123815	-5.546960233
FN1/C1QB	-0.307313318	1.86E-17	-1.114403864	0.269520727	0.52690088	-5.550743501
PABPN1L_degree	0.3066015	1.63E-16	1.111769729	0.270642891	0.527905684	-5.553530582
COL2A1	0.30094764	5.19E-17	1.090860454	0.279666889	0.543577944	-5.575429589
DPM3_degree	-0.30057731	6.71E-17	-1.089491703	0.280264841	0.543577944	-5.57684922
39S ribosomal subunit, mitochondrial	0.300396954	1.12E-16	1.088825137	0.280556358	0.543577944	-5.577539945
MYO18B_degree	-0.299248313	1.33E-16	-1.084580509	0.282417666	0.544350956	-5.581928896
APOC4	-0.299197108	-2.47E-16	-1.084391309	0.282500832	0.544350956	-5.582124146
IGHV3-72_degree	-0.298990394	-3.92E-18	-1.083627538	0.28283673	0.544350956	-5.582912007
FGG/RABGEF1	0.297067585	-7.26E-18	1.076524572	0.285973824	0.549170971	-5.590213476
C1QA/C1QB	-0.294835375	-1.15E-17	-1.06828198	0.289644353	0.553389653	-5.598628587
CNDP1_degree	0.294733427	-7.35E-17	1.067905613	0.289812727	0.553389653	-5.599011348
collagen-containing extracellular matrix	0.294569688	-6.36E-17	1.067301148	0.290083286	0.553389653	-5.59962581
ACYP2_degree	-0.293882953	1.89E-17	-1.064766173	0.291219838	0.554339515	-5.602199067
C9orf131	0.292713964	-1.33E-16	1.060451795	0.29316123	0.55681389	-5.60656507
HRG	-0.292087505	-6.10E-19	-1.05814013	0.294205094	0.557576466	-5.608897382
PARD3/PLCB1	-0.290971492	1.71E-16	-1.054022661	0.296070711	0.557750677	-5.613039496
TOPBP1_degree	-0.290802886	-1.61E-16	-1.053400675	0.296353236	0.557750677	-5.613663854
COL8A1,COL2A1,C1QC	0.290323914	-5.14E-18	1.051633858	0.297156786	0.557750677	-5.615435475
SERPINA4	0.290175335	-4.81E-16	1.051085814	0.29740634	0.557750677	-5.615984428
PABPN1L	-0.290113721	-2.58E-16	-1.050858555	0.297509866	0.557750677	-5.616211983
BTD/TEX15	0.285825286	-4.83E-17	1.035047234	0.304773185	0.569916922	-5.631927561
IGLV3-21_degree	-0.285476213	1.34E-17	-1.033760773	0.305369416	0.569916922	-5.633196135
FGA	0.285053951	3.21E-16	1.032204692	0.306091665	0.569916922	-5.634728548
THBS1_degree	-0.284742078	-5.81E-17	-1.031055487	0.306625809	0.569916922	-5.635858847
C7_degree	0.283522992	7.02E-17	1.026563971	0.30871951	0.572495296	-5.640264825
HPR,HP	0.283018511	7.66E-17	1.024705592	0.309588612	0.572495296	-5.642082389
IGKV4-1	-0.28270314	1.41E-17	-1.023543931	0.310132723	0.572495296	-5.643216923
ACTL8_degree	0.282362716	-1.23E-16	1.02229007	0.310720746	0.572495296	-5.644440112
lipid transporter activity	-0.28202153	-1.16E-17	-1.021033476	0.311310806	0.572495296	-5.645664516
HABP2_degree	0.279913868	-1.37E-16	1.013272669	0.314971837	0.577835023	-5.653194321
BNC2	-0.279317472	1.45E-16	-1.011077171	0.316012768	0.577835023	-5.655314409
PON1/PON3	0.279203717	-4.32E-18	1.010658436	0.316211562	0.577835023	-5.655718258
proMBP-angiotensinogen-c3dg complex	-0.278343235	2.64E-16	-1.007491247	0.317717902	0.57854176	-5.65876762
JAK2/IGHA2	-0.278221511	7.71E-18	-1.007043256	0.317931359	0.57854176	-5.659198199
ORM1,ORM2	0.277059806	3.42E-16	1.002768227	0.319973149	0.581039108	-5.663297766
APOC2	0.275794453	-7.41E-16	0.998112795	0.322206599	0.583873337	-5.667742965
FBXL20_degree	0.27393915	1.43E-17	0.991288758	0.325499242	0.587560192	-5.674222717
PGLYRP2_degree	-0.273885377	3.19E-17	-0.991091007	0.325594991	0.587560192	-5.67440985
SERPINF2_degree	0.272452331	-1.83E-17	0.985821677	0.328153273	0.590948218	-5.679382972
PF4	-0.27177113	1.70E-16	-0.983317362	0.329373801	0.591918136	-5.681737524
XDH	-0.270474749	-6.42E-17	-0.978552278	0.331704476	0.59487497	-5.68620165
IGHM/FN1	0.269920298	-9.43E-18	0.976514623	0.332704452	0.594923072	-5.688104207
ATRN	0.269700114	-4.78E-16	0.975705484	0.333102088	0.594923072	-5.688858635
CFI_degree	0.269102184	-8.78E-17	0.973508348	0.334183415	0.595628757	-5.690904155
MRPS34	0.268621617	-5.81E-17	0.971742636	0.335054095	0.595956874	-5.692544788
PROC	0.267215924	8.22E-17	0.966578658	0.337609063	0.598232642	-5.697326417
ITIH3_degree	-0.266530425	1.28E-16	-0.964060852	0.338859433	0.598232642	-5.699648856
COL2A1/C1QC	0.266435652	9.89E-18	0.96371278	0.339032528	0.598232642	-5.699969458
IGHV3-73	-0.266403978	2.45E-16	-0.96359645	0.339090392	0.598232642	-5.700076582
SHBG_degree	0.265972159	-4.21E-17	0.962010588	0.339879863	0.59840917	-5.701535697
HABP2	0.263938574	4.12E-16	0.954543804	0.343613181	0.602962151	-5.708374431
chylomicron	-0.26380725	-6.49E-17	-0.954061707	0.343855144	0.602962151	-5.708814204
NCAM1	-0.263394103	1.98E-16	-0.952545094	0.344617054	0.603079844	-5.710196265
SERPIND1	0.262027754	-6.73E-16	0.94753015	0.347144296	0.606280179	-5.714751119
VTN	-0.260001034	9.43E-17	-0.94009358	0.350914093	0.611525268	-5.721462514
CPN1/CPN2	0.259634416	3.58E-17	0.938748632	0.351598713	0.611525268	-5.722670834
CA1_degree	0.258422645	-5.14E-18	0.934303815	0.353867427	0.611525268	-5.726652182
USP20_degree	-0.258337729	-6.03E-17	-0.933992374	0.354026747	0.611525268	-5.726930462
NPHS1	-0.258204745	-3.75E-17	-0.933504649	0.354276339	0.611525268	-5.727366074
COCH/SERPINA1	-0.258152373	4.25E-17	-0.933312571	0.354374666	0.611525268	-5.727537567
ZNF25	-0.25738623	4.28E-17	-0.930502926	0.355814972	0.612792453	-5.730042203
GFPT1	-0.255403148	6.94E-17	-0.923232119	0.359559741	0.618015555	-5.736489682
IGHV3-38_degree	-0.254556968	-4.01E-17	-0.9201304	0.361164951	0.619547781	-5.739225229
EIF3B_degree	-0.253936911	7.85E-17	-0.91785782	0.362343981	0.620344331	-5.741223845
BTD/SERPINC1	0.252513303	-1.81E-17	0.912641011	0.365059834	0.623763653	-5.745793597
JAK2_degree	0.25163179	-7.72E-17	0.909411322	0.366747713	0.625416532	-5.748610015
IGHV4-34_degree	-0.25119468	4.32E-17	-0.907810007	0.367586429	0.625617686	-5.750002828
APOE	-0.249188921	-4.28E-16	-0.900463551	0.371449936	0.630956056	-5.756362142
DEFA1/COCH	0.248611072	4.47E-17	0.898347514	0.372567534	0.631618398	-5.758184527
FN1_degree	-0.247193684	3.21E-17	-0.893157994	0.375317442	0.635040039	-5.762636224
C15orf61_degree	0.246282442	-5.91E-17	0.889822259	0.377091804	0.636800945	-5.765484452
CFP	-0.242986903	-3.08E-17	-0.877762502	0.383550823	0.642059009	-5.77569518
CES2,SERPINF2	-0.242749236	-2.19E-16	-0.876893022	0.384019172	0.642059009	-5.776426107
DOCK11_degree	0.242547137	-7.48E-17	0.876153689	0.384417699	0.642059009	-5.777047072
PLTP/UGT8	-0.242242643	1.14E-17	-0.875039809	0.385018609	0.642059009	-5.777981654
C1QA/MCM9	-0.242073617	-1.16E-17	-0.874421515	0.385352417	0.642059009	-5.778499924
CD5L_degree	0.241833478	1.31E-16	0.873543116	0.385826963	0.642059009	-5.779235606
BTD/SUCLG1	0.241738321	7.63E-17	0.873195053	0.386015102	0.642059009	-5.779526919
IRX5	-0.241683738	-3.53E-16	-0.872995404	0.386123045	0.642059009	-5.779693966
KIAA2026_degree	0.237354957	1.19E-16	0.857167286	0.394740715	0.655133729	-5.79281889
APOA4	0.235940133	3.45E-16	0.851996296	0.397581723	0.658589573	-5.797056026
SHBG	-0.232493044	2.18E-16	-0.839402322	0.404553693	0.668862106	-5.807270965
COL2A1_degree	0.231794706	5.90E-17	0.836851736	0.405974763	0.66993554	-5.809321664
UGT8	-0.231093667	6.99E-17	-0.834291555	0.407404247	0.67101876	-5.811373951
SRGAP1	-0.230497702	1.56E-16	-0.832115312	0.408621773	0.67174943	-5.81311364
IGLV3-19	-0.229613483	-8.18E-16	-0.82888683	0.410432074	0.673449981	-5.815686316
HBA1	0.228959838	1.65E-16	0.826500497	0.411773292	0.673861733	-5.817581633
TAS1R3	-0.228545872	-4.27E-16	-0.824989308	0.412624019	0.673861733	-5.818779117
F13B	-0.228064332	3.17E-16	-0.823231552	0.413614894	0.673861733	-5.820169291
PLTP	-0.227847557	5.55E-17	-0.822440304	0.414061404	0.673861733	-5.820794128
F13B_degree	0.227603371	-1.40E-16	0.821549035	0.414564707	0.673861733	-5.821497247
IGHV3-13	-0.225917999	3.50E-16	-0.815398357	0.418048114	0.677379761	-5.826329188
IGHV3-66_degree	0.225704039	6.71E-17	0.814617632	0.418491535	0.677379761	-5.826939984
GP1BA_degree	0.225425018	-5.35E-17	0.813599537	0.419070197	0.677379761	-5.827735626
BCHE/SERPINA6	0.223256256	-7.65E-17	0.805687547	0.423583619	0.681541505	-5.833885699
PON1,PON3	0.222987669	1.95E-17	0.804707875	0.424144498	0.681541505	-5.834643121
NELFA/MCM9	-0.22271144	4.75E-18	-0.803700364	0.424721779	0.681541505	-5.835421125
CES2	-0.222680886	6.41E-16	-0.803588923	0.424785662	0.681541505	-5.835507123
C1R	0.22153377	-7.72E-16	0.799405411	0.427187965	0.683380893	-5.838727016
RLF_degree	-0.221381842	1.45E-17	-0.798851387	0.427506711	0.683380893	-5.839152195
CA10_degree	0.220739325	2.99E-17	0.796508489	0.428856213	0.684277928	-5.840947035
CCDC181	-0.220000438	2.51E-16	-0.793814449	0.430411107	0.684466877	-5.843004503
ORM1_degree	0.219933681	9.77E-18	0.793571062	0.430551745	0.684466877	-5.843190044
SERPINC1	0.21465441	7.80E-16	0.774330803	0.441755743	0.700994488	-5.85768125
GFI1	-0.213141152	1.11E-16	-0.768818359	0.444997018	0.704849292	-5.861768871
IRX5_degree	-0.212461063	-1.06E-16	-0.766341331	0.446458008	0.705029328	-5.863596336
PLCB1-PARD3-PARD6A complex	-0.212332183	-9.89E-18	-0.765871946	0.446735173	0.705029328	-5.86394198
KIAA0513_degree	-0.211315446	-8.22E-18	-0.76216927	0.448925069	0.706285959	-5.866661272
ECM1,FN1,C1QB	0.211207085	-1.61E-16	0.761774678	0.449158813	0.706285959	-5.866950303
SETX_degree	-0.210316103	5.55E-17	-0.758530437	0.451083278	0.708029448	-5.869321091
ECM1/C1QB	-0.208905456	-1.55E-17	-0.753394797	0.454139467	0.711539815	-5.873053774
RETSAT	-0.206911293	-2.22E-16	-0.746136455	0.458479206	0.715199287	-5.878286867
LPIN1_degree	0.20523323	-1.11E-16	0.740030153	0.462148533	0.715199287	-5.882650876
IGHG4/IGHG1	-0.20519019	2.43E-17	-0.73987355	0.462242857	0.715199287	-5.882762333
IGHG4/IGHG3	-0.20519019	2.43E-17	-0.73987355	0.462242857	0.715199287	-5.882762333
IGHG4/IGHG2	-0.20519019	2.43E-17	-0.73987355	0.462242857	0.715199287	-5.882762333
IGHG4/APOD	-0.20519019	2.43E-17	-0.73987355	0.462242857	0.715199287	-5.882762333
IGHG4/AZGP1	-0.20519019	2.43E-17	-0.73987355	0.462242857	0.715199287	-5.882762333
CFB	0.203869045	6.82E-16	0.735067021	0.465143257	0.718192744	-5.886171969
CPN1	0.203555799	-2.58E-16	0.733927507	0.46583239	0.718192744	-5.886977114
C1S,C1R,C1RL	0.202724677	-1.54E-18	0.730904308	0.467663517	0.719463374	-5.889107271
CPN2_degree	0.20228479	1.35E-17	0.729304358	0.468634246	0.719463374	-5.890231109
FGG,RABGEF1	0.201715955	-4.85E-17	0.727235533	0.469891146	0.719463374	-5.891680709
IGKV4-1_degree	-0.201679372	-2.79E-17	-0.727102487	0.469972043	0.719463374	-5.891773795
RELN_degree	0.20072208	4.82E-17	0.723621228	0.472091566	0.721435703	-5.894203507
MUC16	-0.199992275	3.44E-16	-0.720967532	0.473710857	0.722638003	-5.896047937
PZP	-0.19919513	1.49E-16	-0.718069262	0.475482958	0.723668677	-5.898054752
ITGAL_degree	-0.198938626	-3.55E-17	-0.717136726	0.476053934	0.723668677	-5.898698769
THEG	-0.198097247	-1.34E-16	-0.714078049	0.477929412	0.72443566	-5.900805344
PPBP_degree	-0.197751797	1.05E-16	-0.712822326	0.478700576	0.72443566	-5.901667626
UHRF2_degree	0.197589865	-1.43E-16	0.712233718	0.479062291	0.72443566	-5.902071298
CPN1_degree	0.196596497	-5.55E-17	0.708623171	0.481284413	0.726530209	-5.904540274
SERPING1	0.195795837	-4.47E-16	0.705713386	0.483079426	0.727221622	-5.906521079
ZNF397_degree	0.195644968	-9.30E-17	0.705165123	0.483418059	0.727221622	-5.906893406
SERPINC1_degree	0.19413567	2.26E-17	0.699680881	0.486812651	0.731061213	-5.910602118
FAM13A	-0.193532738	-1.85E-17	-0.697490337	0.488172217	0.73183676	-5.912075514
SELENOP	0.191717586	1.74E-16	0.6908966	0.492277274	0.736718404	-5.91648315
MRPL19/MRPS34	-0.190771277	5.96E-17	-0.687459618	0.494424534	0.73865834	-5.9187643
IGHG2/APOD	-0.189713821	-6.32E-17	-0.683619421	0.496829763	0.739705376	-5.921299829
IGHG2/AZGP1	-0.189713821	-6.32E-17	-0.683619421	0.496829763	0.739705376	-5.921299829
RPIA/IGKC	-0.188725323	-3.09E-18	-0.6800301	0.499083628	0.74178868	-5.923657078
AZGP1_degree	0.188313933	-1.37E-16	0.678536438	0.500023191	0.741914752	-5.924634427
SMG5	-0.187393593	1.31E-16	-0.675195159	0.502128444	0.743767047	-5.926813069
BTD_degree	0.186517484	9.66E-17	0.672014802	0.504136761	0.74546969	-5.92887695
TCAF2	-0.185967576	5.35E-17	-0.67001876	0.505399427	0.746065821	-5.930167375
BCHE/FBLN1	0.1850569	2.15E-17	0.666713499	0.507494034	0.747401393	-5.932295887
MRPL58	0.184825797	5.59E-16	0.665874775	0.508026292	0.747401393	-5.932834358
C1QA	-0.183936415	1.32E-16	-0.662647236	0.510077299	0.749149062	-5.934900247
SERPINA4_degree	-0.182050723	-1.10E-16	-0.655805239	0.514439829	0.75428002	-5.939246988
GCK_degree	-0.181465217	1.24E-16	-0.653681114	0.515798227	0.754996393	-5.94058741
NPHS1_degree	0.180512056	-2.38E-17	0.650223502	0.518013476	0.756507359	-5.94276016
APOB_degree	0.179961399	1.16E-16	0.648226155	0.519295447	0.756507359	-5.94401011
IGFALS	-0.179897142	2.47E-17	-0.647993091	0.519445145	0.756507359	-5.944155716
chylomicron assembly	-0.178225324	1.86E-16	-0.641929891	0.523347578	0.760914067	-5.947925539
SELENOP_degree	0.177510937	-2.62E-17	0.639339372	0.525019593	0.762068573	-5.949525554
VMO1	-0.175430582	-8.26E-17	-0.631796765	0.529903779	0.767873923	-5.954147859
ACD	0.174577575	-1.77E-16	0.628704589	0.531912924	0.769500697	-5.956027188
TCAF2_degree	-0.172715902	1.75E-17	-0.621956992	0.536310878	0.774572117	-5.960096588
IGLL5/HBB	-0.170534352	3.52E-18	-0.614051788	0.541487095	0.780748835	-5.964809009
DDX51_degree	-0.169235339	-2.87E-17	-0.609345498	0.544580804	0.78390736	-5.96758625
CFH_degree	0.168160115	-4.68E-17	0.605450498	0.547147998	0.785846961	-5.969868784
FN1	-0.167912949	3.18E-16	-0.604555202	0.547738953	0.785846961	-5.970391399
IGHM	0.166381883	4.57E-16	0.59900984	0.551406459	0.78980331	-5.973611406
JCHAIN_degree	0.163174991	-4.06E-17	0.587397748	0.559126146	0.79901665	-5.980259207
IGHG4	0.162606292	-4.62E-16	0.585338913	0.560500447	0.79901665	-5.981424449
CPB2_degree	-0.16256496	8.08E-17	-0.585189285	0.560600391	0.79901665	-5.981508976
FRYL	-0.161616188	-3.06E-16	-0.581754771	0.562896906	0.799301527	-5.983443325
KNG1_degree	0.161350911	4.25E-17	0.580794541	0.563539803	0.799301527	-5.983982122
lipoprotein metabolic process	-0.161140497	-9.71E-17	-0.58003292	0.564049984	0.799301527	-5.984408851
MYO18B	0.160961698	-2.62E-16	0.579385744	0.564483682	0.799301527	-5.984771024
F2	-0.160028721	2.25E-15	-0.576008967	0.566749257	0.801202532	-5.986654249
YAE1_degree	0.159649073	-3.21E-18	0.57463498	0.567672381	0.801202645	-5.987417406
blood coagulation, intrinsic pathway	0.158965362	1.12E-16	0.572160688	0.569336611	0.802247043	-5.988787162
C1QA,NELFA,MCM9	-0.158083337	8.46E-18	-0.568968972	0.571486908	0.803971857	-5.990545451
PON1	0.156732494	8.12E-16	0.564081335	0.57478742	0.807306602	-5.993219153
TLE2_degree	-0.155318524	5.94E-17	-0.558966003	0.578251558	0.81086002	-5.995992979
PLTP/KLRC4	-0.154483998	-1.50E-17	-0.555947271	0.580300574	0.812420804	-5.997618179
KIAA0513	-0.153443103	1.44E-17	-0.552182388	0.58286093	0.813109159	-5.999632885
SAA2_degree	0.153309361	8.62E-17	0.551698677	0.583190275	0.813109159	-5.999890751
HPR/HP	-0.153141995	7.54E-17	-0.551093362	0.583602542	0.813109159	-6.00021313
C5_degree	-0.152282674	8.38E-17	-0.547985614	0.58572135	0.814004109	-6.001862741
FCN3_degree	-0.152120962	1.23E-16	-0.547400806	0.58612047	0.814004109	-6.002172128
MBTPS1_degree	-0.151499308	-9.04E-17	-0.545152783	0.587655907	0.814832791	-6.00335838
IGHV4-34	-0.146755944	-1.44E-16	-0.528004272	0.599430906	0.829834173	-6.01224837
secretory granule lumen	0.145826964	-1.92E-16	0.524646674	0.601749161	0.831716993	-6.01395605
SAA4	0.144565164	-1.35E-16	0.520086631	0.604904264	0.834748651	-6.016258016
GP1BA	0.143532303	3.76E-16	0.516354356	0.607492278	0.836989361	-6.0181273
IGKC_degree	-0.142996276	-3.21E-18	-0.514417549	0.608837281	0.837513091	-6.019092078
SEMA4D	0.142405297	-3.08E-16	0.512282292	0.610321669	0.838226596	-6.020151547
DHX34_degree	-0.141065912	2.01E-16	-0.507443412	0.61369164	0.841523449	-6.022536333
ITIH1	0.138867446	1.59E-15	0.499502145	0.619240372	0.84655683	-6.026401474
MAMDC2	0.13883877	1.42E-16	0.499398573	0.619312888	0.84655683	-6.026451485
GC,ACTB,GSN	-0.13793692	1.53E-17	-0.496141384	0.621595346	0.847664616	-6.028019008
IGLL5,HBB	-0.137747004	3.01E-17	-0.495455501	0.622076452	0.847664616	-6.028347793
RABGEF1	-0.136247813	1.20E-16	-0.490041577	0.625879794	0.850245902	-6.030927183
HSDL2	-0.136228098	-2.30E-16	-0.489970385	0.625929875	0.850245902	-6.030960914
KAT5	0.134645078	1.39E-16	0.484254517	0.629956578	0.854378608	-6.033653269
C1QA/C1QC	-0.1327029	3.85E-19	-0.47724289	0.634911538	0.858993074	-6.036913166
AZGP1	-0.132207974	-1.16E-16	-0.475456301	0.636176778	0.858993074	-6.037736259
SALL2	0.132148918	2.25E-16	0.475243125	0.636327819	0.858993074	-6.037834266
DNAJC25	-0.131626153	-2.18E-16	-0.473356135	0.637665481	0.859462169	-6.038699903
APOC2_degree	0.131083786	8.39E-17	0.471398472	0.63905452	0.859998951	-6.039594348
IFT46	-0.130439368	3.33E-16	-0.469072578	0.640706522	0.860887402	-6.040652254
NCAM1_degree	-0.12960509	4.55E-17	-0.46606161	0.642847822	0.862429535	-6.042014046
FMNL3	-0.128967476	3.85E-16	-0.463760558	0.644486306	0.86290705	-6.043048891
IGFALS_degree	-0.12869305	-4.31E-17	-0.462770232	0.645192022	0.86290705	-6.043492702
PROS1	0.127935054	2.51E-16	0.460034959	0.647142907	0.864005705	-6.044713614
IGLV3-19_degree	0.127600669	1.18E-16	0.458828365	0.648004279	0.864005705	-6.045249903
TTN	0.126823078	1.24E-16	0.456022637	0.650009121	0.865349567	-6.046491546
C4BPB_degree	0.12576133	-9.25E-17	0.452191888	0.652750592	0.866957642	-6.048174591
ACYP2	0.125581788	6.17E-17	0.451544139	0.653214629	0.866957642	-6.048457787
PROZ_degree	0.124562986	5.58E-17	0.447868704	0.655850255	0.868602481	-6.050057054
LPIN1	-0.124329323	6.04E-16	-0.447025779	0.656455331	0.868602481	-6.050422001
SELL	0.123723083	-1.81E-16	0.444838888	0.658026222	0.8693558	-6.051365637
ERF_degree	-0.123102721	-1.07E-16	-0.442601162	0.659635231	0.869960758	-6.052326451
SEMA4D_degree	0.121192769	2.01E-16	0.435712403	0.664598624	0.869960758	-6.055254066
C1S_degree	-0.120569042	-3.88E-17	-0.433462983	0.666222629	0.869960758	-6.056200154
IQCG_degree	0.120464958	-8.08E-17	0.433087623	0.666493782	0.869960758	-6.056357553
SI_degree	0.120234283	-1.06E-16	0.43225575	0.667094873	0.869960758	-6.0567059
THBS1	-0.120147347	7.56E-17	-0.431942239	0.667321464	0.869960758	-6.05683701
MSI1_degree	-0.119833781	4.93E-17	-0.430811467	0.668138995	0.869960758	-6.057309112
UHRF2	-0.118658317	-3.94E-16	-0.426572793	0.671207074	0.869960758	-6.059067833
INPP5D	0.118509716	-7.38E-16	0.42603697	0.67159532	0.869960758	-6.059288928
EIF3B	-0.117851525	-1.98E-16	-0.423663751	0.673315985	0.869960758	-6.060264861
PON1_degree	0.117772461	-8.55E-17	0.423378681	0.673522788	0.869960758	-6.060381725
DPM3	-0.117759436	-1.05E-17	-0.423331718	0.67355686	0.869960758	-6.06040097
VMO1_degree	-0.11767871	5.29E-17	-0.42304066	0.673768038	0.869960758	-6.060520195
RPIA_degree	0.117668421	-9.20E-17	0.423003563	0.673794956	0.869960758	-6.060535385
CES2_degree	0.117421611	-1.34E-17	0.422113689	0.67444078	0.869960758	-6.060899364
C1QC	-0.116880598	7.66E-16	-0.420163129	0.675857255	0.869960758	-6.061694522
APOL1 complex A (APOL1, APOA1, HPR, C3)	-0.116629213	2.21E-16	-0.419256814	0.676515812	0.869960758	-6.062062742
ECM1	-0.116625789	2.67E-17	-0.41924447	0.676524783	0.869960758	-6.062067752
PLTP,UGT8,KLRC4	-0.114531104	3.90E-18	-0.41169321	0.682021612	0.875731892	-6.065104879
GVINP1_degree	-0.113367002	5.04E-17	-0.407497168	0.685083575	0.87836417	-6.066768813
FGA/FGG	-0.112491496	7.50E-17	-0.404341614	0.687389768	0.880021119	-6.068008977
ITPR3	0.111154834	1.01E-16	0.399524318	0.690916174	0.881716796	-6.069883734
APOL1/IGHM	-0.110983895	1.51E-17	-0.398908291	0.691367622	0.881716796	-6.070121863
PLG_degree	-0.11083472	-6.65E-17	-0.398370702	0.69176168	0.881716796	-6.070329373
IGKV1-9	-0.109531769	7.27E-17	-0.393675446	0.695206975	0.882141998	-6.072129914
RAD50/ACD	-0.109364325	-1.49E-17	-0.393072085	0.69565018	0.882141998	-6.072359752
C1QB_degree	0.109184324	-7.68E-17	0.392423482	0.696126738	0.882141998	-6.072606433
ARHGAP33_degree	-0.109171593	5.19E-17	-0.392377608	0.696160448	0.882141998	-6.072623865
KIAA2026	0.108392887	1.25E-15	0.389571777	0.698223469	0.883466431	-6.073686204
high-density lipoprotein particle remodeling	-0.106593188	-3.06E-16	-0.38308768	0.70299971	0.886481785	-6.076112188
PRAG1_degree	0.106512852	-3.08E-18	0.382798258	0.703213182	0.886481785	-6.076219528
IGHM,GCN1	-0.106039263	9.28E-17	-0.381092117	0.70447209	0.886481785	-6.076850662
BCHE	0.105956663	-1.25E-16	0.380794548	0.704691742	0.886481785	-6.076960451
GSN	0.105192051	3.41E-16	0.378040106	0.706726142	0.887561041	-6.077972661
COCH	0.104556764	-1.38E-16	0.375751655	0.708418002	0.887561041	-6.078808067
RELN	0.10448197	2.16E-17	0.375482235	0.708617283	0.887561041	-6.078906087
SERPINA6_degree	0.10400679	-1.48E-16	0.373770597	0.709883798	0.887866191	-6.079527181
ACTL8	0.103089743	-1.73E-16	0.370467473	0.712330243	0.888487739	-6.080717786
RABGEF1_degree	0.103053138	1.09E-16	0.370335628	0.712427957	0.888487739	-6.080765091
SYDE2_degree	0.102424731	-1.91E-17	0.368072279	0.714106136	0.889302906	-6.081574551
YLPM1	0.100796921	-3.18E-16	0.362209793	0.718459502	0.892234044	-6.083648232
IGHV3-64_degree	-0.100775943	-8.63E-17	-0.362134244	0.718515664	0.892234044	-6.083674739
Rap1 complex	0.099685118	1.15E-16	0.358206037	0.721438014	0.894583137	-6.085045395
FAM13A_degree	0.098550158	2.06E-17	0.354119184	0.724482817	0.89696927	-6.086455611
HRG_degree	-0.097917187	-1.52E-17	-0.351840062	0.726182762	0.89696927	-6.08723505
C5	-0.097470471	-7.93E-16	-0.350231633	0.727383286	0.89696927	-6.087782102
COCH_degree	-0.09715914	-3.08E-17	-0.349110696	0.728220355	0.89696927	-6.088161875
UGT8/KLRC4	0.09692428	-5.01E-18	0.348265106	0.728852026	0.89696927	-6.088447558
IGKV1-9_degree	-0.096660177	1.60E-17	-0.347314243	0.729562563	0.89696927	-6.088767983
lipid transport	-0.096263017	-2.04E-16	-0.345884353	0.730631503	0.897012934	-6.08924819
C1q complex	0.094558684	1.85E-17	0.339748678	0.735224406	0.901376814	-6.091286368
IVD_degree	0.092025177	1.85E-17	0.330629102	0.742068849	0.907806189	-6.094248613
B4GALT2	-0.091843527	-1.53E-16	-0.32997529	0.742560362	0.907806189	-6.094457902
SERPINA6	-0.090887358	-4.11E-16	-0.326533871	0.745149265	0.909689961	-6.095552714
C1QC_degree	0.089820765	7.34E-17	0.322695242	0.748040465	0.911595621	-6.096760398
APOL1	-0.089056033	-1.58E-16	-0.319943149	0.750115543	0.911595621	-6.097617485
IGLV3-21	0.088890532	1.13E-16	0.319347564	0.750564858	0.911595621	-6.097802006
APOL1/APOA1	0.088362869	1.79E-17	0.31744871	0.751997952	0.911595621	-6.098388011
PRPH2,NCAM1	0.088092341	-1.62E-16	0.316475211	0.752733007	0.911595621	-6.098687092
FAM71D_degree	-0.087989833	6.62E-17	-0.316106337	0.75301159	0.911595621	-6.098800179
CDH1_degree	-0.086828845	-2.89E-17	-0.311928684	0.756168962	0.914142979	-6.100071766
C8G_degree	0.085051608	-1.88E-17	0.305534071	0.761009935	0.916908701	-6.101985491
MRPL19	-0.084966961	-3.21E-16	-0.30522952	0.761240734	0.916908701	-6.102075649
AMBP_degree	0.084577077	-1.94E-16	0.303826784	0.762304051	0.916908701	-6.102489751
FBLN1_degree	0.084228378	3.88E-17	0.302572246	0.76325542	0.916908701	-6.102858493
SYDE2	-0.084021692	4.75E-18	-0.30182865	0.763819494	0.916908701	-6.103076338
FNIP2_degree	0.083664423	4.26E-17	0.300543321	0.764794815	0.916908701	-6.103451629
MRPS34_degree	-0.082501098	2.67E-17	-0.296358248	0.767973135	0.919027921	-6.104662526
MTX3	-0.081949664	-2.09E-16	-0.294374552	0.76948104	0.919027921	-6.105230569
ITGAL	-0.081855425	1.09E-16	-0.294035547	0.769738823	0.919027921	-6.105327264
C4A	-0.081380306	-4.83E-16	-0.292326434	0.771038852	0.919315554	-6.105813069
HPX_degree	0.080851815	8.65E-17	0.290425382	0.772485653	0.919777156	-6.106350114
LAMP5	-0.079748196	1.99E-16	-0.286455683	0.775509412	0.920846678	-6.107460283
HERC3_degree	0.07925836	-2.74E-17	0.284693823	0.77685256	0.920846678	-6.107948125
FRYL_degree	-0.079252268	1.65E-16	-0.284671909	0.77686927	0.920846678	-6.107954174
SALL2_degree	-0.078941972	3.14E-17	-0.283555849	0.777720454	0.920846678	-6.108261624
MCM9	-0.078589256	-9.73E-17	-0.282287234	0.778688319	0.920846678	-6.108609636
C8A_degree	0.077726658	-1.36E-16	0.279184822	0.781056725	0.92114902	-6.109454149
FNIP2	0.077455137	1.86E-16	0.278208298	0.781802642	0.92114902	-6.109718044
C8G	0.077259616	4.14E-16	0.277505118	0.782339894	0.92114902	-6.1099075
IGHV4-39_degree	-0.07695071	1.48E-16	-0.276394166	0.783188913	0.92114902	-6.110205846
COL8A1/COL2A1	-0.074823243	-2.06E-18	-0.268743391	0.789042976	0.926778488	-6.112228045
MMP28_degree	-0.073611817	1.08E-16	-0.264387224	0.792381624	0.92944223	-6.113354139
IQCG	-0.072919714	3.64E-17	-0.261898603	0.794290707	0.930397144	-6.113989222
APOF_degree	-0.072446935	7.58E-17	-0.260198659	0.795595504	0.930397144	-6.114419595
SI	-0.071741353	3.41E-16	-0.257661709	0.797543836	0.930397144	-6.115056671
CPB2	-0.071501142	-1.42E-16	-0.256798037	0.798207417	0.930397144	-6.115272134
ADIPOQ	0.071213607	-3.80E-16	0.255764229	0.799001913	0.930397144	-6.115529093
MBTPS1	-0.070987421	2.08E-16	-0.254951003	0.799627038	0.930397144	-6.115730498
MRPL58_degree	0.069679473	-9.84E-17	0.250248597	0.803244342	0.933354871	-6.116882556
SUCLG1_degree	0.067949937	6.36E-17	0.244030898	0.808033906	0.937665014	-6.118372993
HBA1_degree	-0.066576957	1.24E-16	-0.239095352	0.811841079	0.940825176	-6.119529446
BRD3	-0.06581697	-4.59E-16	-0.236363502	0.813950338	0.941493761	-6.120159409
ZNF397	-0.065587544	4.03E-16	-0.235538823	0.814587344	0.941493761	-6.12034816
CP_degree	0.06495905	-5.90E-17	0.233279723	0.816332982	0.942256687	-6.120861846
TFB2M	0.062934473	2.10E-16	0.226002852	0.821962233	0.945508507	-6.122482905
APOL1 complex B (APOL1, APOA1, HPR, FN1, IGHM)	-0.062292356	9.68E-17	-0.223695036	0.823749495	0.945508507	-6.122986304
AFM_degree	-0.062123788	-1.57E-16	-0.223089203	0.824218831	0.945508507	-6.123117599
SUCLG1	-0.061681456	1.13E-17	-0.221499475	0.825450692	0.945508507	-6.12346043
AMBP	-0.061429073	1.34E-16	-0.220592428	0.82615375	0.945508507	-6.123654941
APOB	-0.060549954	-9.35E-16	-0.217433014	0.828603744	0.945508507	-6.12432624
PLG	-0.060257726	7.76E-16	-0.216382816	0.829418508	0.945508507	-6.124547241
AHSG_degree	0.060145214	1.05E-16	0.215978479	0.829732251	0.945508507	-6.124632043
TBC1D2	0.060097153	-2.03E-17	0.215805764	0.829866277	0.945508507	-6.124668219
APOC3	-0.0598019	-5.12E-16	-0.214744714	0.830689756	0.945508507	-6.124889825
APOL1/C3	-0.059643192	-1.54E-16	-0.214174369	0.831132478	0.945508507	-6.125008495
MUC16_degree	0.058389826	1.09E-16	0.209670312	0.834630608	0.946612749	-6.125934564
JAK2,IGHA2,JCHAIN	-0.058332826	-1.06E-16	-0.209465482	0.834789772	0.946612749	-6.125976211
GLRB	-0.058123317	-2.11E-16	-0.208712622	0.835374845	0.946612749	-6.126128939
ZNF25_degree	-0.056149249	2.57E-19	-0.201619167	0.840891948	0.951622178	-6.127540979
RAD50_degree	0.055657436	5.18E-17	0.199852007	0.842267657	0.951937924	-6.127885168
DOCK11	-0.053128099	-3.74E-16	-0.190764184	0.849350105	0.957999111	-6.129607408
CLU	-0.052229392	-5.96E-16	-0.18753535	0.85186948	0.957999111	-6.130200037
F2_degree	-0.052039045	-1.38E-16	-0.186851493	0.852403275	0.957999111	-6.130324258
CEP164_degree	-0.051510382	-3.54E-17	-0.184952194	0.853886166	0.957999111	-6.130666881
UGT8_degree	0.051321454	-3.74E-17	0.184273451	0.854416228	0.957999111	-6.130788475
ZNF426_degree	-0.050578411	-1.54E-18	-0.181604034	0.856501552	0.957999111	-6.131262358
ITIH2_degree	0.050553076	-1.80E-16	0.181513016	0.856572673	0.957999111	-6.131278394
blood microparticle	0.050406745	3.15E-16	0.180987321	0.856983469	0.957999111	-6.131370857
CFI	0.049128079	1.01E-15	0.176393827	0.860574663	0.957999111	-6.132167392
CASR	0.047978013	1.19E-16	0.172262477	0.863807081	0.957999111	-6.132866318
FYN	-0.047484089	-2.80E-16	-0.170488212	0.865196009	0.957999111	-6.133161403
TBC1D2_degree	0.047470621	-1.37E-16	0.17043983	0.865233889	0.957999111	-6.133169407
ADIPOQ_degree	-0.04733052	-7.40E-17	-0.169936567	0.865627934	0.957999111	-6.133252527
C3	0.046943671	-8.76E-16	0.168546962	0.866716144	0.957999111	-6.133480763
DEFA1/SERPINA1	-0.046373105	4.87E-17	-0.166497451	0.868321604	0.957999111	-6.133813968
HSDL2_degree	-0.046151072	-1.82E-16	-0.165699901	0.868946505	0.957999111	-6.133942532
CEP164	-0.046122101	1.60E-16	-0.165595839	0.869028047	0.957999111	-6.133959261
FLOT2_degree	-0.046097397	1.14E-16	-0.165507101	0.869097582	0.957999111	-6.133973518
APOE/C9	0.045967899	3.33E-17	0.165041944	0.869462095	0.957999111	-6.134048129
PGLYRP2	-0.045881872	-2.22E-16	-0.164732935	0.869704262	0.957999111	-6.134097577
SUCLG1/TEX15	0.044834467	-2.93E-17	0.160970731	0.872653649	0.960029616	-6.134692192
SERPINA7	0.043812216	-1.95E-16	0.157298988	0.875533869	0.961366172	-6.135259277
IGHG2_degree	0.043121947	-1.20E-16	0.154819725	0.877479633	0.961366172	-6.135634794
COL8A1	-0.043037348	-2.18E-16	-0.154515869	0.877718156	0.961366172	-6.135680407
CPN2	0.042831414	-3.24E-16	0.153776221	0.878298818	0.961366172	-6.135791064
IGHV3-66	-0.041536963	3.86E-16	-0.149127058	0.881950179	0.96355684	-6.136474466
CHD8	0.0413349	9.41E-17	0.148401339	0.882520378	0.96355684	-6.136579252
BCHE/COCH	0.040733657	2.21E-17	0.146241978	0.884217362	0.964087929	-6.136888017
IPMK_degree	0.040375604	3.37E-17	0.144956044	0.885228202	0.964087929	-6.137069744
APOC4_degree	-0.038767386	7.95E-17	-0.139180347	0.889770669	0.967820728	-6.137866178
PF4_degree	0.037991664	8.07E-17	0.136394533	0.891962992	0.968991085	-6.138238758
IGA2	0.037309865	-2.41E-16	0.133946061	0.893890539	0.968999116	-6.138560005
AP5M1_degree	0.037199329	8.74E-18	0.133549105	0.894203101	0.968999116	-6.138611539
MSI1	-0.036025948	2.01E-16	-0.129335371	0.897522016	0.97138293	-6.139149155
TLE2	-0.035293683	-1.13E-17	-0.126705791	0.89959412	0.972413071	-6.139475926
FYN_degree	0.034642628	7.30E-17	0.12436787	0.901436987	0.973193165	-6.139760819
MTA1	0.034028653	-8.56E-16	0.122163137	0.903175368	0.973664454	-6.140024625
APOE_degree	0.03369615	1.06E-16	0.120969157	0.904116993	0.973664454	-6.140165521
FBLN1	0.032748793	2.54E-17	0.117567356	0.906800554	0.975243743	-6.140559367
extracellular region	0.032385268	-3.61E-17	0.116262019	0.907830581	0.975243743	-6.140707513
HYDIN_degree	0.031648998	6.76E-17	0.113618261	0.909917224	0.976277071	-6.141002494
C1QA/NELFA	0.030015859	-7.04E-18	0.10775422	0.914547798	0.978359883	-6.141632579
CAMKK1_degree	-0.029710969	8.71E-17	-0.106659484	0.915412597	0.978359883	-6.141746511
KAT5_degree	0.029083798	-4.70E-17	0.104407592	0.917191826	0.978359883	-6.141977214
ACD_degree	-0.028804177	1.46E-17	-0.103403603	0.917985219	0.978359883	-6.142078486
FMNL3_degree	0.028520465	-1.14E-16	0.102384933	0.918790299	0.978359883	-6.142180238
C6_degree	-0.028278994	-1.19E-16	-0.101517935	0.919475577	0.978359883	-6.142266048
PRAG1	0.027415572	1.11E-16	0.098417857	0.921926384	0.978359883	-6.142566903
A1BG_degree	0.027330161	2.89E-17	0.098111193	0.922168863	0.978359883	-6.142596157
BCHE_degree	0.02726461	-1.89E-16	0.09787584	0.922354962	0.978359883	-6.142618547
PPBP	0.026666094	-5.56E-16	0.095726929	0.92405435	0.978359883	-6.14282049
RETSAT_degree	0.026594719	1.00E-16	0.095470664	0.924257032	0.978359883	-6.142844274
USP20	0.025074424	-5.71E-17	0.090012299	0.928575266	0.979593062	-6.143335716
LUM_degree	0.024796605	7.48E-17	0.089014855	0.929364603	0.979593062	-6.143422395
ECM1_degree	-0.024786873	-2.06E-17	-0.088979912	0.929392257	0.979593062	-6.143425414
JCHAIN	0.024595414	6.81E-16	0.088292524	0.929936271	0.979593062	-6.143484564
APOC3_degree	-0.023717971	8.31E-17	-0.085142298	0.932429857	0.981029231	-6.143749775
APOF	0.023215212	2.63E-16	0.083337292	0.933858931	0.981343283	-6.143897395
CHD8_degree	-0.022307287	5.29E-17	-0.080077697	0.936440195	0.982865887	-6.144155963
AHSG	-0.021697735	-1.05E-15	-0.077889334	0.93817354	0.983495933	-6.14432377
SELL_degree	0.020613192	2.16E-17	0.073995739	0.94125829	0.984497338	-6.144610843
GFPT1_degree	-0.020564353	-3.35E-17	-0.073820403	0.941397224	0.984497338	-6.144623424
IGKC	0.019529732	1.55E-16	0.070106086	0.94434082	0.986387282	-6.144882932
RAD50	-0.01819483	1.68E-16	-0.065313824	0.948139832	0.989165114	-6.145197967
C1RL_degree	-0.017206001	-3.92E-17	-0.061764001	0.950954699	0.990910779	-6.145416953
F5	-0.016769255	1.34E-17	-0.06019613	0.95219816	0.99101679	-6.145509779
A1BG	-0.015439198	-4.26E-17	-0.055421408	0.95598566	0.992893082	-6.145777768
SERPINA7_degree	-0.015099156	-2.06E-17	-0.054200713	0.956954131	0.992893082	-6.145842729
MCM9_degree	0.014587705	-4.16E-17	0.052364696	0.958410906	0.992893082	-6.145937711
AFM	0.013920494	2.64E-16	0.049969546	0.960311535	0.992893082	-6.1460567
CIT	-0.01365132	2.21E-16	-0.049003267	0.961078374	0.992893082	-6.146103127
RLF	0.013104932	-2.78E-16	0.047041862	0.962635059	0.992893082	-6.146194579
OR1I1_degree	0.012905929	-7.49E-17	0.04632749	0.963202063	0.992893082	-6.14622696
BTD,SERPINC1,SUCLG1,TEX15	-0.012652238	-2.32E-17	-0.045416801	0.963924913	0.992893082	-6.14626752
APOL1/FN1	-0.012522029	-2.31E-17	-0.044949385	0.964295931	0.992893082	-6.146288025
FN1/FYN	0.010789198	-2.06E-17	0.038729006	0.969234173	0.993535381	-6.146540715
ITIH1_degree	0.010735591	2.13E-17	0.038536573	0.969386963	0.993535381	-6.146547933
SERPINF1	-0.010280208	1.30E-16	-0.036901886	0.970684928	0.993535381	-6.1466078
ITGB6-FYN-FN1 complex	-0.009877216	-5.65E-17	-0.035455273	0.971833626	0.993535381	-6.146658615
LRG1_degree	0.009655207	1.82E-17	0.034658333	0.972466471	0.993535381	-6.146685741
C1R_degree	0.009384566	-1.54E-16	0.033686822	0.973237965	0.993535381	-6.146717976
DHX34	-0.008918003	1.92E-16	-0.032012019	0.974568014	0.993535381	-6.146771393
CDH1	0.008906292	-5.75E-17	0.031969982	0.974601399	0.993535381	-6.146772699
RBP4_degree	-0.008688826	-7.86E-17	-0.031189352	0.975221365	0.993535381	-6.146796634
VTN_degree	0.006257805	5.78E-19	0.022462888	0.98215276	0.998326331	-6.14702393
PLCB1	-0.005981964	-2.03E-16	-0.021472728	0.982939337	0.998326331	-6.14704505
SETX	-0.005544505	8.84E-17	-0.019902422	0.984186814	0.998326331	-6.147076592
ACTB/GSN	-0.005331343	-3.59E-17	-0.01913726	0.984794686	0.998326331	-6.147091094
MRPL19_degree	-0.005022746	4.65E-17	-0.018029519	0.98567473	0.998326331	-6.147111081
EHBP1L1	0.003975742	-2.47E-16	0.014271208	0.988660646	0.998357005	-6.147170016
KLRC4	-0.003844475	-7.20E-17	-0.013800015	0.989035013	0.998357005	-6.147176438
MTX3_degree	0.003802208	-3.62E-17	0.013648292	0.989155558	0.998357005	-6.147178459
SERPIND1_degree	0.002403004	7.71E-18	0.008625742	0.993146166	1	-6.147232771
IGLV1-47_degree	-0.001382898	2.83E-18	-0.004964003	0.996055674	1	-6.147256929
SAA2/SAA1	-0.001171744	-5.68E-17	-0.004206052	0.996657927	1	-6.147260304
ECM1/FN1	0.000432381	1.87E-17	0.001552058	0.998766752	1	-6.147267723
C1S/C1R	-5.93E-05	-9.77E-18	-0.000212922	0.999830815	1	-6.14726887
C1S/C1RL	-5.93E-05	-9.77E-18	-0.000212922	0.999830815	1	-6.14726887
TPR_degree	-3.55E-15	-6.828081044	-3.70E-14	1	1	-6.147268892
TPR	-3.55E-15	-6.828081044	-3.70E-14	1	1	-6.147268892
