# Supplementary material for: Integration of protein context improves protein-based COVID-19 patient stratification
Source: Clin Proteomics. 2022 Aug 11;19:31. doi: 10.1186/s12014-022-09370-0 (PMC9366758; doi:10.1186/s12014-022-09370-0)
Supplement: Supplementary file 4 — Additional file 4: Table S3. The complexs, differential proteins and enriched pathways used as features. [file 12014_2022_9370_MOESM4_ESM.xlsx]

## Sheet: TableS1
Table S3. The complexs, differential proteins and enriched pathways used as features
Complex: The complexes identified in Bioplex and CORUM with matched proteins
Differential proteins: The differential proteins filtered by Limma (p value <0.05)
Enriched pathway based on differential proteins: The pathways identified in G:Profiler with matched proteins

## Sheet: Complex
Type	name	matched proteins
Complexes identified by CORUM	BASC complex (BRCA1-associated genome surveillance complex)	RFC1,RAD50
	APOL1 complex A (APOL1, APOA1, HPR, C3)	APOL1,C3,APOA1
	APOL1 complex B (APOL1, APOA1, HPR, FN1, IGHM)	APOL1,IGHM,APOA1,FN1
	vWF-GPIb complex	VWF,GP1BA
	BRCA1-BARD1-BACH1-DNA damage complex II	TOPBP1,RAD50
	proMBP-angiotensinogen-c3dg complex	AGT,C3
	TTR-RBP complex	RBP4,TTR
	Fibrinogen complex	FGA,FGG
	55S ribosome, mitochondrial	MRPL19,MRPS34,MRPL45
	39S ribosomal subunit, mitochondrial	MRPL19,MRPL45
	C1q complex	C1QA,C1QB,C1QC
	ITGB6-FYN-FN1 complex	FN1,FYN
	Carboxypeptidase N	CPN1,CPN2
	PLCB1-PARD3-PARD6A complex	PARD3,PLCB1
	Rap1 complex	RAD50,ACD
	Polycystin-1-E-cadherin-beta-catenin-Flotillin-2 complex	CDH1,FLOT2
Functional complexes idnetified by BioPlex	JAK2,IGHA2,JCHAIN	JAK2,IGHA2,JCHAIN
	HPR,HP	HPR,HP
	TMEM185A,FYN	TMEM185A,FYN
	APOC2,APOE,C9	APOC2,APOE,C9
	COL8A1,COL2A1,C1QC	COL8A1,COL2A1,C1QC
	IGLL5,HBB	IGLL5,HBB
	C1S,C1R,C1RL	C1S,C1R,C1RL
	PON1,PON3	PON1,PON3
	CES2,SERPINF2	CES2,SERPINF2
	C1QA,NELFA,MCM9	C1QA,NELFA,MCM9
	PZP,A2M	PZP,A2M
	IGHM,GCN1	IGHM,GCN1
	BCHE,FBLN1,DEFA1,COCH,SERPINA6,SERPINA1	BCHE,FBLN1,DEFA1,COCH,SERPINA6,SERPINA1
	PLTP,UGT8,KLRC4	PLTP,UGT8,KLRC4
	STEAP3,APOA2	STEAP3,APOA2
	SAA2,SAA1,YLPM1	SAA2,SAA1,YLPM1
	IGHG4,IGHG1,IGHG3,IGHG2,APOD,AZGP1	IGHG4,IGHG1,IGHG3,IGHG2,APOD,AZGP1
	GC,ACTB,GSN	GC,ACTB,GSN
	F9,ERF,SERPINA7	F9,ERF,SERPINA7
	PROS1,C4BPB	PROS1,C4BPB
	ECM1,FN1,C1QB	ECM1,FN1,C1QB
	BTD,SERPINC1,SUCLG1,TEX15	BTD,SERPINC1,SUCLG1,TEX15
	PRPH2,NCAM1	PRPH2,NCAM1
	RPIA,IGKC	RPIA,IGKC
	FGG,RABGEF1	FGG,RABGEF1
	ORM1,ORM2	ORM1,ORM2
	LILRB4,CLU	LILRB4,CLU

## Sheet: Differential proteins
proteins
MYRIP
C9
SAA1
IGLV1-47
TTR
SAA2
TDRD1
SIRT7
SERPINB5
CCDC54
IGHG3
SCFD2
COPG2
JAK2
CRYBG3
IGKV2-24
CFHR2
EML6
APCS
RPIA
MMP28
OPHN1
WHAMM
RFC1
LILRB4
RGS8
C7
A2M
IGHV3-72
SART1
CAMKK1
ST8SIA1
PDPR
SERPINA1
IGHV3-35
C4BPA
VWF
APOA2
CD5L
ZNF426
FLOT2
IGHV4-39
ITIH4
PCSK4
TSPOAP1
IGHV3-38
IGHV3-64
AGT
APOH
SZT2
GC
ZACN
GPX3
TMEM185A
C4BPB
GCN1
IGKV3-20
OR1I1
ZNF268
ST13P5
APOM
IGHV7-4-1
KLHL15
DTX3L
C8B
LPA
C15orf61
TOPBP1
NOX5
PRICKLE2
KNG1

## Sheet: Enriched Pathway
Pathway	Matched proteins
blood microparticle ( 45 )	IGHA1,APOA4,GCN1,CD5L,ITIH4,IGHG4,A2M,TCAF2,IGF2,ZNF25,UHRF2,COPG2,WHAMM,TFB2M,APOA1,CLU,AMBP,KNG1,HP,C4BPA,IGHM,C4BPB,APOA2,APOE,APOC3,HERC3,TMCC3,PZP,CPN2,ITIH2,APOL1,C1QB,IGHG2,VTN,ITIH1,C1S,PON1,FCN3,A1BG,C1QC,HRG,HBB
extracellular region ( 111 )	IGHA1,APOA4,GCN1,CD5L,ITIH4,RFC1,IGHG4,APOD,A2M,APOC4,GPX3,TCAF2,IGF2,ZNF25,UHRF2,COPG2,WHAMM,TFB2M,APOA1,VWF,SAA2,CLU,AMBP,ZNF397,NCAM1,KNG1,HP,C4BPA,CNDP1,IGHM,COCH,SAA1,C4BPB,APOH,APOA2,APOE,FBLN1,SAA4,APOC3,HERC3,TMCC3,APOF,HMCN1,PZP,CPN2,ITIH2,LUM,APOC2,ECM1,APOL1,C1QB,IGHG2,PROC,IQCG,GP1BA,ST13P5,SPTBN5,XDH,VTN,APOC1,MUC16,ITIH3,FLOT2,RELN,PROZ,GFPT1,VMO1,ITIH1,C1S,FTCD,PON1,PLTP,APOM,SETX,…
extracellular space ( 107 )	IGHA1,APOA4,GCN1,CD5L,ITIH4,RFC1,IGHG4,APOD,A2M,APOC4,GPX3,TCAF2,IGF2,ZNF25,UHRF2,COPG2,WHAMM,TFB2M,APOA1,VWF,SAA2,CLU,AMBP,ZNF397,KNG1,HP,C4BPA,IGHM,COCH,SAA1,C4BPB,APOH,APOA2,APOE,FBLN1,SAA4,APOC3,HERC3,TMCC3,APOF,HMCN1,PZP,CPN2,ITIH2,LUM,APOC2,ECM1,APOL1,C1QB,IGHG2,PROC,IQCG,GP1BA,ST13P5,SPTBN5,XDH,VTN,APOC1,MUC16,ITIH3,FLOT2,RELN,PROZ,GFPT1,VMO1,ITIH1,C1S,FTCD,PON1,PLTP,APOM,APOB,PEBP1,LCAT,B…
regulation of complement activation ( 32 )	CD5L,IGHG4,A2M,TCAF2,IGF2,ZNF25,UHRF2,COPG2,CLU,C4BPA,C4BPB,APOC3,HERC3,TMCC3,C1QB,IGHG2,SPTBN5,CPN2,VTN,C1S,APOC2,KIAA2026,TTC27,BNC2,MAMDC2,PRICKLE2,DNAJC25,C1QA,C1QC
extracellular exosome ( 83 )	IGHA1,APOA4,GCN1,ITIH4,RFC1,IGHG4,APOD,A2M,GPX3,TCAF2,IGF2,ZNF25,UHRF2,COPG2,WHAMM,TFB2M,APOA1,VWF,SAA2,CLU,AMBP,ZNF397,KNG1,HP,IGHM,SAA1,C4BPA,C4BPB,APOH,APOA2,APOE,FBLN1,SAA4,APOC3,HERC3,TMCC3,HMCN1,PZP,CPN2,ITIH2,LUM,ECM1,IGHG2,IQCG,GP1BA,SPTBN5,VTN,MUC16,ITIH3,FLOT2,PROZ,GFPT1,VMO1,ITIH1,FTCD,PON1,APOB,PEBP1,LCAT,BTD,APOC2,KIAA2026,TTC27,BNC2,MAMDC2,PRICKLE2,DNAJC25,C1RL,PLCB1,ATRN,LBP,KLKB1,…
complement activation, classical pathway ( 28 )	IGHA1,IGHG4,CLU,C4BPA,IGHM,C4BPB,APOC3,HERC3,TMCC3,C1QB,IGHG2,SPTBN5,C1S,APOC2,KIAA2026,TTC27,BNC2,MAMDC2,PRICKLE2,DNAJC25,C1RL,C1QA,C1QC,C1R
collagen-containing extracellular matrix ( 33 )	APOA4,ITIH4,A2M,TCAF2,IGF2,ZNF25,UHRF2,COPG2,APOA1,VWF,CLU,AMBP,ZNF397,NCAM1,KNG1,COCH,APOH,APOE,FBLN1,HMCN1,PZP,ITIH2,LUM,ECM1,C1QB,VTN,ITIH1,APOC3,MMP28,C1QA,A1BG,C1QC,HRG
platelet degranulation ( 14 )	ITIH4,A2M,WHAMM,TFB2M,APOA1,VWF,CLU,KNG1,APOH,ECM1,IGF2,ITIH3,A1BG,HRG
acute-phase response ( 11 )	ITIH4,TCAF2,IGF2,ZNF25,UHRF2,COPG2,SAA2,HP,SAA1,SAA4,LBP
high-density lipoprotein particle ( 20 )	APOA4,APOC4,APOA1,SAA2,CLU,SAA1,APOH,APOA2,APOE,SAA4,APOF,APOC2,APOL1,APOC1,PON1,PLTP,APOM,APOB,LCAT,APOC3
platelet alpha granule lumen ( 7 )	A2M,VWF,CLU,KNG1,IGF2,A1BG,HRG
endocytic vesicle lumen ( 6 )	APOA1,HP,SAA1,APOE,APOB,HBB
blood coagulation, intrinsic pathway ( 12 )	A2M,TCAF2,IGF2,ZNF25,UHRF2,COPG2,VWF,ZNF397,KNG1,APOH,GP1BA,KLKB1
complement activation ( 38 )	IGHA1,CD5L,IGHG4,A2M,TCAF2,IGF2,ZNF25,UHRF2,COPG2,CLU,C4BPA,IGHM,C4BPB,APOC3,HERC3,TMCC3,C1QB,IGHG2,SPTBN5,CPN2,VTN,C1S,APOC2,KIAA2026,TTC27,BNC2,MAMDC2,PRICKLE2,DNAJC25,C1RL,C1QA,FCN3,C1QC,C1R
phagocytosis, engulfment ( 8 )	IGHA1,IGHG4,IGHM,APOC3,HERC3,TMCC3,IGHG2
immunoglobulin complex, circulating ( 5 )	IGHA1,IGHG4,IGHM,IGHG2
positive regulation of cholesterol esterification ( 5 )	APOA4,APOA1,APOA2,APOE,APOC1
defense response to bacterium ( 13 )	IGHA1,IGHG4,TCAF2,IGF2,ZNF25,UHRF2,COPG2,HP,IGHM,COCH,IGHG2,LBP
immunoglobulin receptor binding ( 5 )	IGHA1,IGHG4,IGHM,IGHG2
positive regulation of B cell activation ( 5 )	IGHA1,IGHG4,IGHM,IGHG2
phagocytosis, recognition ( 6 )	IGHA1,IGHG4,IGHM,IGHG2,FCN3
receptor-mediated endocytosis ( 21 )	IGHA1,WHAMM,TFB2M,APOA1,CLU,AMBP,HP,SAA1,APOE,APOC3,HERC3,TMCC3,APOC2,APOL1,VTN,APOC1,OPHN1,MRC1,APOB,HBB
innate immune response ( 43 )	IGHA1,APOA4,IGHG4,A2M,CLU,NCAM1,C4BPA,IGHM,COCH,SAA1,C4BPB,APOE,APOC3,HERC3,TMCC3,APOL1,C1QB,IGHG2,SPTBN5,MUC16,MRC1,C1S,APOB,FYN,APOC2,KIAA2026,TTC27,BNC2,MAMDC2,PRICKLE2,DNAJC25,C1RL,LBP,GFI1,PSME4,C1QA,FCN3,C1QC,DTX3L,JAK2
complement activation, alternative pathway ( 3 )	APOC3,HERC3,TMCC3
endoplasmic reticulum lumen ( 25 )	APOA4,TCAF2,IGF2,ZNF25,UHRF2,COPG2,WHAMM,TFB2M,APOA1,CLU,ZNF397,KNG1,APOA2,APOE,APOC3,HERC3,TMCC3,CPN2,ITIH2,APOL1,PROC,ST13P5,VTN,PROZ,APOB
antigen binding ( 6 )	IGHA1,IGHG4,IGHM,IGHG2,FCN3
high-density lipoprotein particle remodeling ( 10 )	APOA4,APOA1,APOA2,APOE,APOC2,APOC1,PLTP,APOM,LCAT,APOC3
reverse cholesterol transport ( 9 )	APOA4,APOA1,CLU,APOA2,APOE,APOC2,APOM,LCAT,APOC3
B cell receptor signaling pathway ( 5 )	IGHA1,IGHG4,IGHM,IGHG2
very-low-density lipoprotein particle ( 12 )	APOA4,APOC4,APOA1,APOH,APOA2,APOE,APOC2,APOL1,APOC1,APOM,APOB,APOC3
other organism cell ( 2 )	C4BPA,C4BPB
lipid transporter activity ( 10 )	APOA4,APOD,APOC4,APOA1,APOA2,APOE,APOF,PLTP,APOM,APOB
negative regulation of endopeptidase activity ( 16 )	ITIH4,A2M,AMBP,KNG1,C4BPA,C4BPB,APOC3,HERC3,TMCC3,PZP,ITIH2,VTN,ITIH3,ITIH1,PEBP1,HRG
phosphatidylcholine-sterol O-acyltransferase activator activity ( 5 )	APOA4,APOA1,APOA2,APOE,APOC1
regulation of cholesterol transport ( 9 )	APOA4,APOA1,APOA2,APOE,APOC2,APOC1,PON1,PLTP,APOC3
membrane attack complex ( 1 )	SPTBN5
heparin binding ( 12 )	TCAF2,IGF2,ZNF25,UHRF2,COPG2,KNG1,SAA1,APOH,APOE,VTN,APOB,HRG
external side of plasma membrane ( 15 )	IGHA1,IGHG4,TCAF2,IGF2,ZNF25,UHRF2,COPG2,WHAMM,TFB2M,NCAM1,IGHM,IGHG2,GP1BA,ST13P5
spherical high-density lipoprotein particle ( 7 )	APOA1,CLU,APOA2,APOC2,PON1,APOM,APOC3
serine-type endopeptidase inhibitor activity ( 9 )	ITIH4,A2M,AMBP,PZP,ITIH2,ITIH3,ITIH1,PEBP1,HRG
chylomicron remodeling ( 7 )	APOA4,APOA1,APOA2,APOE,APOC2,APOB,APOC3
very-low-density lipoprotein particle remodeling ( 7 )	APOA4,APOA1,APOA2,APOE,APOC2,LCAT,APOC3
chylomicron assembly ( 7 )	APOA4,APOA1,APOA2,APOE,APOC2,APOB,APOC3
phospholipid efflux ( 7 )	APOA4,APOA1,APOA2,APOE,APOC2,APOC1,APOC3
high-density lipoprotein particle assembly ( 6 )	APOA4,APOA1,APOA2,APOE,APOM,LCAT
chylomicron ( 9 )	APOA4,APOA1,APOH,APOA2,APOE,APOC2,APOC1,APOB,APOC3
lipid transport ( 19 )	APOA4,APOD,APOC4,APOA1,CLU,APOH,APOA2,APOE,APOF,APOC2,APOL1,APOC1,PON1,PLTP,APOM,APOB,LCAT,APOC3,LBP
retinoid metabolic process ( 8 )	APOA4,APOA1,APOA2,APOE,APOC2,APOM,APOB,APOC3
cytolysis ( 9 )	TCAF2,IGF2,ZNF25,UHRF2,COPG2,APOL1,SPTBN5,LBP,HRG
lipoprotein metabolic process ( 12 )	APOA4,APOD,APOA1,DPM3,APOA2,APOE,APOL1,APOC1,APOM,APOB,LCAT,APOC3
negative regulation of proteolysis ( 23 )	ITIH4,A2M,TCAF2,IGF2,ZNF25,UHRF2,COPG2,AMBP,KNG1,C4BPA,C4BPB,APOC3,HERC3,TMCC3,PZP,ITIH2,ECM1,VTN,ITIH3,OPHN1,ITIH1,PEBP1,HRG
cholesterol efflux ( 11 )	APOA4,APOA1,APOA2,APOE,APOC2,APOC1,PON1,PLTP,APOM,APOB,APOC3
serine-type endopeptidase activity ( 25 )	CD5L,TCAF2,IGF2,ZNF25,UHRF2,COPG2,ZNF397,HP,PROC,ST13P5,PROZ,C1S,PCSK4,APOC2,KIAA2026,TTC27,BNC2,MAMDC2,PRICKLE2,DNAJC25,C1RL,KLKB1,HABP2,C1R
phosphatidylcholine binding ( 6 )	APOA4,APOA1,IGHM,APOA2,APOC1,PLTP
platelet activation ( 14 )	TCAF2,IGF2,ZNF25,UHRF2,COPG2,VWF,DGKK,SAA1,APOE,GP1BA,FYN,ITPR3,HRG,HBB
secretory granule lumen ( 18 )	ITIH4,A2M,WHAMM,TFB2M,APOA1,VWF,CLU,KNG1,HP,APOH,APOC3,HERC3,TMCC3,ECM1,IGF2,ITIH3,A1BG,HRG
Fc-gamma receptor signaling pathway involved in phagocytosis ( 4 )	IGHG4,IGHG2,FYN
signaling receptor binding ( 40 )	IGHA1,IGHG4,A2M,TCAF2,IGF2,ZNF25,UHRF2,COPG2,WHAMM,TFB2M,APOA1,VWF,SAA2,CLU,KNG1,IGHM,SAA1,APOA2,APOE,SAA4,APOC3,HERC3,TMCC3,APOF,ECM1,IGHG2,VTN,OPHN1,FLOT2,RELN,APOB,FYN,KAT5,CASR,LBP,HRG,JAK2
